# Supplementary material for: Possible competitive modes of decarboxylation in the annulation reactions of ortho-substituted anilines and arylglyoxylates
Source: Royal Society of Chemistry journal article supplement (doi:10.1039/d0ob00360c), 2020-12-18
Supplement: d0ob00360c1.pdf [file d0ob00360c1.pdf]

## ***Supporting Information***

### **Possible competitive modes of decarboxylation in the annulation reactions of ortho-substituted anilines and arylglyoxylates**

*Joydev K. Laha, Surabhi Panday, Monika Tomar and Ketul Patel*

Department of Pharmaceutical Technology (Process Chemistry),  
National Institute of Pharmaceutical Education and Research,  
S. A. S. Nagar, Punjab, India

#### **Table of Contents**

|                          |        |
|--------------------------|--------|
| 1. GENERAL CONSIDERATION | S-1    |
| 2. EXPERIMENTAL SECTION  | S-2-3  |
| 3. CHARACTERIZATION DATA | S-4-5  |
| 4. REFERENCES            | S-5-6  |
| 5. SPECTRAS              | S-7-30 |

## 1. GENERAL CONSIDERATION

Unless noted otherwise, all reagents and solvents were purchased from commercial sources and used as received. All palladium-catalyzed reactions were performed in a screw-cap sealed tube. The  $^1\text{H}$  and  $^{13}\text{C}$  NMR spectra were obtained in  $\text{CDCl}_3$  as solvent using a 400 MHz spectrometer with  $\text{Me}_4\text{Si}$  as an internal standard. Coupling constants ( $J$  values) are reported in Hz. Column chromatography was performed using silica gel (60-120, 100-200, or 230-400 mesh). High Resolution Mass Spectra (HRMS) were obtained using Electron spray ionization (ESI) technique and as TOF mass analyzer. New compounds were characterized by  $^1\text{H}$  NMR,  $^{13}\text{C}$  NMR, IR, and HRMS data. The glassware's to be used in reaction were thoroughly washed and dried in an oven and the experiments were carried out with required precautions. All the reagents are obtained from the commercial sources and were used as received. Reactions were monitored by TLC, which was performed with 0.2 mm Merck pre-coated silica gel 60 F254 Aluminium sheets. TLC plates were visualized with UV light,  $^1\text{H}$  and  $^{13}\text{C}$  spectra were recorded on Bruker Avance 400 MHz and 100 MHz NMR spectrometer in  $\text{CDCl}_3$  with residual undeuterated solvent ( $\text{CDCl}_3$ : 7.26/7.00) using  $\text{Me}_3\text{SiCl}$  as an internal standard. Chemical shifts ( $\delta$ ) are given in ppm and  $J$  values are given in Hz, pattern was designated as s, singlet; bs, broad singlet; d, doublet; dd, doublet of doublet; dt, triplet of doublet; t, triplet; m, multiplet.

## 1. EXPERIMENTATION SECTION

### 1.1 Preparation of substituted $\alpha$ -oxocarboxylic acids

All submitted  $\alpha$ - oxoacid were synthesized from oxidation of corresponding methyl ketones with  $\text{SeO}_2$  as reported in the literature.<sup>1</sup>

### 2.2 General procedure for the synthesis of potassium salts of the $\alpha$ -oxocarboxylic acids

Following a literature procedure, a solution of potassium tert-butoxide (1 mmol) in ethanol (1 mL) was added drop by drop to a solution of  $\alpha$ -oxocarboxylic acids (1 mmol) in ethanol (1 mL) over 30 minutes. After complete addition, the reaction mixture was stirred for another 2 h at room temperature. A gradual formation of a precipitate was observed. The resulting solid was collected by filtration, washed with ethanol (2 x 10.0 mL), diethyl ether (10.0 mL) respectively, transferred to a round-bottomed flask and dried it under vacuum to give corresponding potassium salts of  $\alpha$ -oxocarboxylic acids.

## **2.3 General procedure for the preparation of 2-Aryl Quinazoline**

### **2.3.1 Synthesis of 2-Aryl Quinazoline from salt of $\alpha$ -oxocarboxylic acid and Amine (3a)**

2-aminobenzylamine (0.3 mmol), salt of  $\alpha$ -oxocarboxylic acid (1.2 equiv) and potassium persulphate (3 equiv) were dissolved in 2 mL of CH<sub>3</sub>CN in an oven dried seal tube and stirred the reaction at 80 °C for 12 h. After completion of reaction, water (20 mL) was added and layers were separated. The organic layer was extracted with ethyl acetate (3 x 20 mL) and dried over sodium sulphate. Removal of the solvent under vacuum afforded the crude product, which was purified by column chromatography using hexane/ethyl acetate mixture and was analyzed by <sup>1</sup>H NMR, <sup>13</sup> C NMR gave the corresponding pale yellow cyclic product (**92%**).

### **2.4 General procedure for the preparation of N-(2-aminobenzyl)benzamide**

2-aminobenzylamine (0.3 mmol), triethylamine (2 equiv) and Benzoyl chloride (2 equiv) were dissolved in 2 mL of DCM in an oven dried round bottomed flask maintained at 0 °C. The reaction was allowed to run for 12 h at room temperature. After completion of reaction, water (20 mL) was added and layers were separated. The organic layer was extracted with ethyl acetate (3 x 20 mL) and dried over sodium sulphate. Removal of the solvent under vacuum afforded the crude product, which was purified by column chromatography using hexane/ethyl acetate mixture and was analyzed by <sup>1</sup>H NMR, <sup>13</sup> C NMR gave the corresponding off white solid product (**92%**).

**2.5. General Procedure for the Synthesis of 2H-1,2,4-benzothiadiazine-1,1-dioxide** In an oven-dried sealed tube, 2-aminobenzenesulphonamide (51.6 mg, 0.30 mmol), phenylglyoxylate (67.7 mg, 0.36 mmol) and potassium persulphate (243.27 mg, 0.90 mmol) were dissolved in CH<sub>3</sub>CN (2 mL) and the mixture was heated at 80 °C for 16 h. After completion of the reaction, water (20 mL) was added and the layers were separated. The aqueous layer was extracted with ethyl acetate (3 x 20 mL) and the combined organic layer was dried over Na<sub>2</sub>SO<sub>4</sub>. Removal of the solvent with rotary evaporator afforded the crude product, which upon purification by chromatography using hexane/ethyl acetate (3:7) afforded a dark yellow solid.

### 3 CHARACTERIZATION DATA

**2-Phenylquinazoline (3a):**<sup>2</sup> (89% yield); white solid; mp 97-98 °C; <sup>1</sup>H NMR (500 MHz, CDCl<sub>3</sub>) δ 9.47 (s, 1H), 8.62-8.60 (dd, *J* = 7.9, 1.6 Hz, 2H), 8.10-8.08 (d, *J* = 8.5 Hz, 1H), 7.94 – 7.91 (m, 2H), 7.61-7.60 (t, *J* = 7.5 Hz, 1H), 7.60 – 7.56 (m, 3H). <sup>13</sup>C NMR (500 MHz, CDCl<sub>3</sub>-d) δ 160.61, 134.24, 130.71, 128.70, 127.31, 77.36, 77.10, 76.85.

**2-(o-Tolyl)quinazoline (3b):**<sup>3</sup> (83% yield); a pale yellow solid; mp 43-45 °C; <sup>1</sup>H NMR (500 MHz, CDCl<sub>3</sub>) δ 9.50 (s, 1H), 8.10-8.08 (d, *J* = 8.5 Hz, 1H), 7.99-7.86 (m, 3H), 7.66 (t, *J* = 7.4 Hz, 1H), 7.37-7.32 (dt, *J* = 13.1, 6.4 Hz, 3H), 2.60 (s, 3H).

**2-(3-Methoxyphenyl)quinazoline (3c):**<sup>4</sup> (72% yield); a pale yellow solid; mp 119-122 °C <sup>1</sup>H NMR (400 MHz, CDCl<sub>3</sub>): δ 9.49 (s, 1H), 8.26-8.24 (d, *J* = 7.72 Hz, 1H), 8.22 (d, *J* = 2.3 Hz, 1H), 8.13-8.11 (d, *J* = 8.44, 1H), 7.96-7.91 (m, 2H), 7.66-7.62 (t, *J* = 7.5 Hz, 1H), 7.49-7.46 (t, *J* = 7.9 Hz, 1H), 7.11-7.08 (dd, *J* = 8.12, 2.4 Hz, 1H), 3.98 (s, 3H). <sup>13</sup>C NMR (101 MHz, CDCl<sub>3</sub>) δ 160.28, 159.86, 159.46, 150.17, 138.93, 133.52, 129.06, 128.11, 126.63, 123.09, 120.60, 116.68, 112.48, 54.89, 31.36, 29.13, 22.12.

**2-(p-Tolyl)quinazoline (3d):**<sup>5</sup> (88% yield); a yellow solid; mp 97-98 °C; <sup>1</sup>H NMR (400 MHz, CDCl<sub>3</sub>): δ 9.48 (s, 1H), 8.54-8.52 (d, *J* = 8.12 Hz, 2H), 8.10-8.09 (d, *J* = 8.44 Hz, 1H), 7.97-7.87 (m, 2H), 7.64-7.62 (t, *J* = 7.44 Hz, 2H), 7.38-7.36 (d, *J* = 8.0, 1H), 2.47 (s, 3H). <sup>13</sup>C NMR (500 MHz, CDCl<sub>3</sub>) δ 161.15, 160.46, 150.80, 140.89, 134.07, 129.44, 128.54, 127.10, 123.52, 21.55.

**2-(4-Chlorophenyl)quinazoline (3e):**<sup>5</sup> (52.5 mg, 80% yield); a yellow solid; mp 136-138 °C; <sup>1</sup>H NMR (400 MHz, CDCl<sub>3</sub>): δ 9.48 (s, 1H), 8.61-8.59 (d, *J* = 8.52 Hz, 2H), 8.11-8.09 (d, *J* = 8.44 Hz, 1H), 7.96-7.93 (m, 2H), 7.68-7.64 (t, *J* = 7.5 Hz, 1H), 7.54-7.52 (d, *J* = 8.5 Hz, 2H). <sup>13</sup>C NMR (101 MHz, CDCl<sub>3</sub>) δ 160.57, 136.85, 134.30, 129.90, 128.85, 128.60, 127.50, 127.18, 123.63, 77.34, 77.03, 76.71.

**2-(4-Fluorophenyl)quinazoline (3f):**<sup>5</sup> (82% yield); a pale yellow solid; mp 131-133 °C; <sup>1</sup>H NMR (400 MHz, CDCl<sub>3</sub>): δ 9.44 (s, 1H), 8.63-8.61 (m, 2H), 8.07-8.06 (d, *J* = 8.44 Hz, 1H), 7.94-7.88 (m, 2H), 7.61-7.60 (t, *J* = 7.4 Hz, 1H), 7.20-7.18 (t, *J* = 8.76 Hz, 2H).

**2-(2-Bromophenyl)quinazoline (3g):**<sup>6</sup> (72% yield); a yellow solid; mp 124-126 °C; <sup>1</sup>H NMR (400 MHz, CDCl<sub>3</sub>): δ 9.56 (s, 1H), 8.18-8.15 (d, *J* = 8.5 Hz, 1H), 8.06-7.97 (m, 2H), 7.83-7.77 (m, 3H), 7.51-7.47 (dd, *J* = 7.5, 6.9 Hz, 1H), 7.37-7.35 (dt, *J* = 15, 1.64 Hz, 1H). <sup>13</sup>C NMR (101 MHz, CDCl<sub>3</sub>) δ 162.82, 160.28, 150.27, 140.16, 134.47, 133.72, 131.67, 130.44, 128.64, 128.12, 127.51, 127.19, 123.31, 121.91, 77.36, 77.04, 76.72, 29.72, 14.15.

**2-(Naphthalen-2-yl)quinazoline (3h):**<sup>7</sup> (82% yield); a pale yellow solid; mp 120-121 °C; <sup>1</sup>H NMR (400 MHz, CDCl<sub>3</sub>): δ 9.55 (s, 1H), 9.18 (s, 1H), 8.77-8.75 (dd, *J* = 8.64 Hz, 1.4 Hz, 1H), 8.18-8.16 (d, *J* = 8.40 Hz, 1H), 8.10-8.06 (m, 1H), 8.04-8.02 (d, *J* = 6.6 Hz, 1H), 7.98-7.92 (dd, *J* = 15.3, 7.7 Hz, 3H), 7.69-7.65 (t, *J* = 7.5 Hz, 1H), 7.60-7.55 (m, 2H). <sup>13</sup>C NMR (400 MHz, CDCl<sub>3</sub>) δ 160.56, 134.24, 133.42, 129.29, 128.97, 128.50, 127.74, 127.59 – 127.03, 126.26, 125.41, 77.34, 77.03, 76.71.

**2-(Thiophen-2-yl)quinazoline (3i):**<sup>7</sup> (91% yield); a yellow solid; mp 108–110 °C; <sup>1</sup>H NMR (400 MHz, CDCl<sub>3</sub>): δ 9.38 (s, 1H), 8.18-8.17 (d, *J* = 3.6 Hz, 1H), 8.05-8.02 (d, 8.80 Hz, 1H), 7.92–7.89 (m, 2H), 7.62-7.58 (t, *J* = 7.59 Hz, 1H), 7.55-7.54 (d, *J* = 5 Hz, 1H), 7.23-7.21 (m, 1H). <sup>13</sup>C NMR (101 MHz, CDCl<sub>3</sub>) δ 160.55, 157.86, 150.63, 143.84, 134.38, 129.96, 129.23, 128.40, 128.20, 127.29, 127.02, 123.38, 77.35, 77.04, 76.72.

**2-(Furan-2-yl)quinazoline (3j):**<sup>8</sup> (85% yield); a yellow solid; <sup>1</sup>H NMR (400 MHz, CDCl<sub>3</sub>): δ 9.38 (s, 1H), 8.11-8.09 (d, *J* = 8.9 Hz, 1H), 7.93-7.88 (m, 2H), 7.69 (d, *J* = 0.8 Hz, 1H), 7.63-7.58 (m, 1H), 7.46 (d, *J* = 3.5 Hz, 1H), 6.62 (dd, *J* = 3.4 Hz, 1.8 Hz, 1H). <sup>13</sup>C NMR (500 MHz, CDCl<sub>3</sub>-d) δ 134.67, 128.49, 127.41, 114.23, 112.45, 77.33, 77.10, 76.85.

**3-Phenyl-2H-benzo[e][1,2,4]thiadiazine 1,1-dioxide (5a):**<sup>6</sup> (55% yield); a dark yellow solid; mp. 308-310 °C; <sup>1</sup>H NMR (400 MHz, DMSO-*d*<sub>6</sub>): δ 12.2 (s, 1H), 8.06-8.04 (d, *J* = 7.32, 2H), 7.88-7.86 (d, *J* = 7.88, 1H), 7.77-7.69 (m, 2H), 7.65-7.62 (m, 3H), 7.53-7.49 (t, *J* = 7.28 Hz, 1H).

**3-(3-Methoxyphenyl)-2H-benzo[e][1,2,4]thiadiazine 1,1-dioxide (5b):**<sup>6</sup> (48% yield); a dark yellow solid; ; mp. 323-325 °C <sup>1</sup>H NMR (500 MHz, DMSO-*d*<sub>6</sub>): δ 12.13 (s, 1H), 7.84-7.82 (d, *J* = 7.92, 1H), 7.77-7.73 (m, 1H), 7.62-7.57 (m, 2H), 7.55-7.48 (m, 3H), 7.26-7.23 (m, 1H), 3.84 (s, 3H). <sup>13</sup>C NMR (126 MHz, DMSO-*d*<sub>6</sub>) δ 133.6, 123.87, 121.00, 119.07, 113.87, 41.21, 40.08, 39.52.

**3-(4-Bromophenyl)-2H-benzo[e][1,2,4]thiadiazine 1,1-dioxide (5c):**<sup>6</sup> (42% yield); a dark yellow solid; mp 236-238 °C <sup>1</sup>H NMR (500 MHz, DMSO-*d*<sub>6</sub>): δ 12.21 (s, 1H), 7.97-7.96 (d, *J* = 8.56, 2H), 7.84-7.81 (m, 3H), 7.73-7.69 (t, *J* = 7.7 Hz, 1H), 7.60-7.58 (m, 1H), 7.49-7.48 (t, *J* = 7.48 Hz, 1H). <sup>13</sup>C NMR (126 MHz, DMSO-*d*<sub>6</sub>) δ 123.74, 122.65, 109.4, 107.68, 72.78, 72.28, 72.09, 71.70.

**Tert-butyl 2-benzamidobenzylcarbamate (24)** White solid; <sup>1</sup>H NMR (400 MHz, DMSO): δ 10.17 (s, 1H), 8.02-8.00 (d, *J* = 7.44 Hz, 2H), 7.62-7.59 (m, 1H), 7.55-7.45 (m, 4H), 7.31=7.28 (t,

$J = 7.24, 7.12$  Hz, 2H), 7.25-7.23 (d,  $J = 7.76$ , 1H), 6.0 (d, 2H), 1.37 (s, 9H);  $^{13}\text{C}$  NMR (100 MHz, DMSO):  $\delta$  165.9, 156.7, 135.9, 134.8, 132.1, 128.8, 1128.5, 128.1, 127.5, 126.3, 126.1, 78.6, 28.6

**N-phenylbenzamide (6)<sup>9</sup>**: White solid;  $^1\text{H}$  NMR (400 MHz,  $\text{CDCl}_3$ ):  $\delta$  7.8 (dd  $J = 7.9, 0.9$  Hz, 2H), 7.83 (brs, 1H), 7.64 (dd,  $J = 8.6, 1.0$  Hz, 2H), 7.56 (tt,  $J = 7.3, 1.3$  Hz, 1H), 7.50-7.46 (m, 2H), 7.40-7.35 (m, 2H), 7.15 (tt,  $J = 7.4, 1.0$  Hz, 1H).

**2-Phenylquinazolin-4(3H)-one(7)<sup>9</sup>**: White solid (63 mg, 95%);  $^1\text{H}$  NMR (400 MHz,  $\text{CDCl}_3$ )  $\delta$  11.69 (s, 1H), 8.36 (d,  $J = 7.8$  Hz, 1H), 8.29 (dd,  $J = 6.3, 2.8$  Hz, 2H), 7.93 – 7.74 (m, 2H), 7.64 – 7.59 (m, 3H), 7.54 (d,  $J = 6.7$  Hz, 1H).

**2-Phenyl-1H-benzo[d]imidazole (8)<sup>9</sup>**: White solid (23 mg, 40%);  $^1\text{H}$  NMR (400 MHz, DMSO)  $\delta$  12.59 (s, 1H), 8.31 (d,  $J = 6.7$  Hz, 2H), 7.85 (d,  $J = 7.9$  Hz, 1H), 7.53 (dd,  $J = 21.7, 6.7$  Hz, 4H), 7.34 (t,  $J = 8.1$  Hz, 2H).

**2-Phenylbenzo[d]thiazole (9)<sup>9</sup>**: White solid (47 mg, 75%);  $^1\text{H}$  NMR (400 MHz,  $\text{CDCl}_3$ )  $\delta$  8.12 (ddd,  $J = 9.7, 5.0, 3.3$  Hz, 3H), 7.94 (dd,  $J = 8.0, 0.5$  Hz, 1H), 7.56 – 7.49 (m, 4H), 7.45 – 7.39 (m, 1H).

#### 4. REFERENCES

1. K. Wadhwa, C. Yang, P. R. West, K. C. Deming, S. R. Chemburkar and R. E. Reddy, Synthesis of Arylglyoxylic acids and their Collision Induced Dissociation. *Syn. Comm.*, 2008, **38**, 4434-4444.
2. C. Malakar, A. Baskakova, J.R Conrad and U. Beifuss, Copper-Catalyzed Synthesis of Quinazolines in Water Starting from o-Bromobenzylbromides and Benzamidines. *Chem. Eur. J.* 2012, **18**, 8853-8861.
3. T. Yamaguchi, Y. Sugiura, E. Yamaguchi, N. Tada, and Itoh, Synthetic Method for the Preparation of Quinazolines by the Oxidation of Amines using Singlet Oxygen. *Asian J. Org. Chem.* 2017, **6**, 432 – 435.
4. J. Chen, K. Natte, H. Neumann and X. A Wu, Convenient Palladium-Catalyzed Carbonylative Synthesis of Quinazolines from 2-Aminobenzylamine and Aryl bromides. *RSC Adv.* 2014, **4**, 56502-56505.
5. X.L. Yang, Q.Y. Meng, X.W. Gao, T. Lei, C.J Wu, B. Chen, C.- H. Tung, L.-Z Wu Superoxide Mediated Radical Anion-Mediated Aerobic Oxidative Synthesis of 2- Substituted Quinazolines under Visible Light. *Asian J. Org. Chem.* 2017, **6**, 449-452.
6. F. Xuesen, L. Bin, G. Shenghai, W. Yuanyuan and Xinying, Z. Synthesis of Quinazolines and Tetrahydroquinazolines: Copper Catalyzed Tandem Reactions of 2- Bromobenzylbromides with Aldehydes and Aqueous Ammonia or Amines. *Chem. Asian J.* 2014, **9**, 739 – 743.
7. J. Ma, Y. Wan, C. Hong, M. Li, X. Hu, W.Mo, B. ,N Sun, L. Jin, Z. Shen, ABNO-Catalyzed Aerobic Oxidative Synthesis of 2-Substituted 4H-3, 1-Benzoxazines and Quinazolines *Eur. J. Org. Chem.* 2017, **23**, 3335–3342.
8. A. R. Tiwari, B. M. Bhanage, Synthesis of Quinazolines from 2-Aminobenzylamines with Benzylamines and N-substituted Benzylamines under Transition Metal Free Conditions. *Org. Biomol. Chem.* 2016, **14**, 10567–10571.
9. J.K. Laha, K.V. Patel, K.S. Tummalapalli, N. Dayal, Formation of amides, their intramolecular reactions to the synthesis of N-heterocycles, and preparation of a marketed drug, Sildenafil: A comprehensive coverage. *Chem. Commun.*, 2016, **52**, 10245-10248

## 5.1 Copies of $^1\text{H}$ and $^{13}\text{C}$ NMR spectra

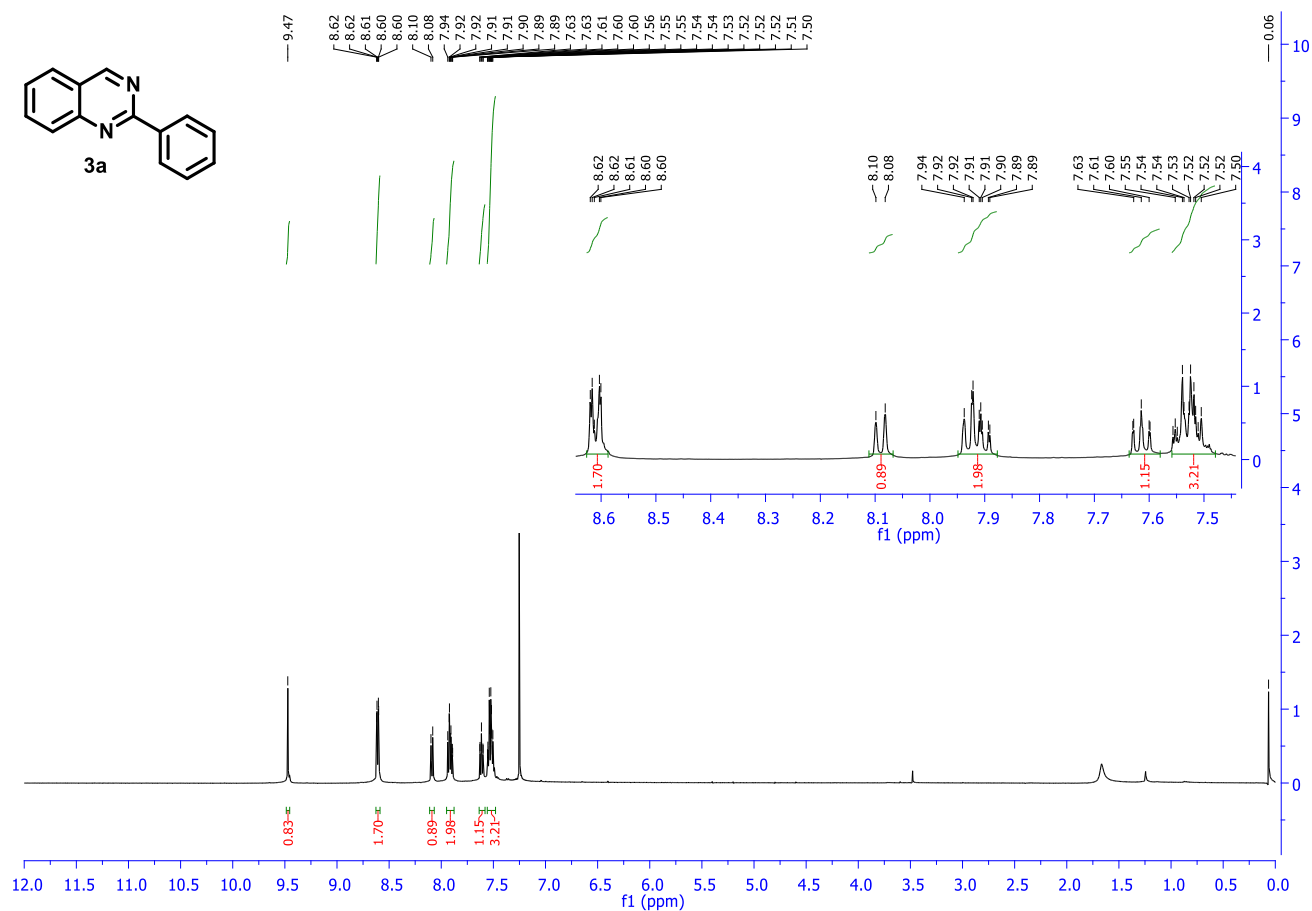

## $^{13}\text{C}$ Spectra

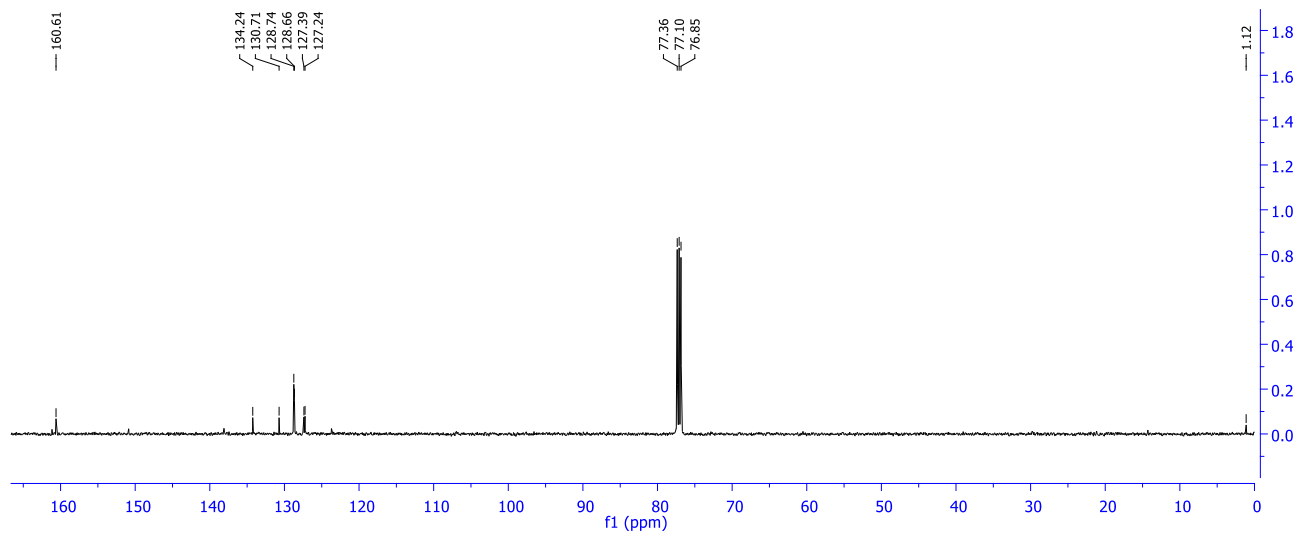



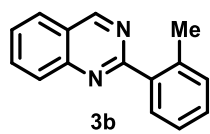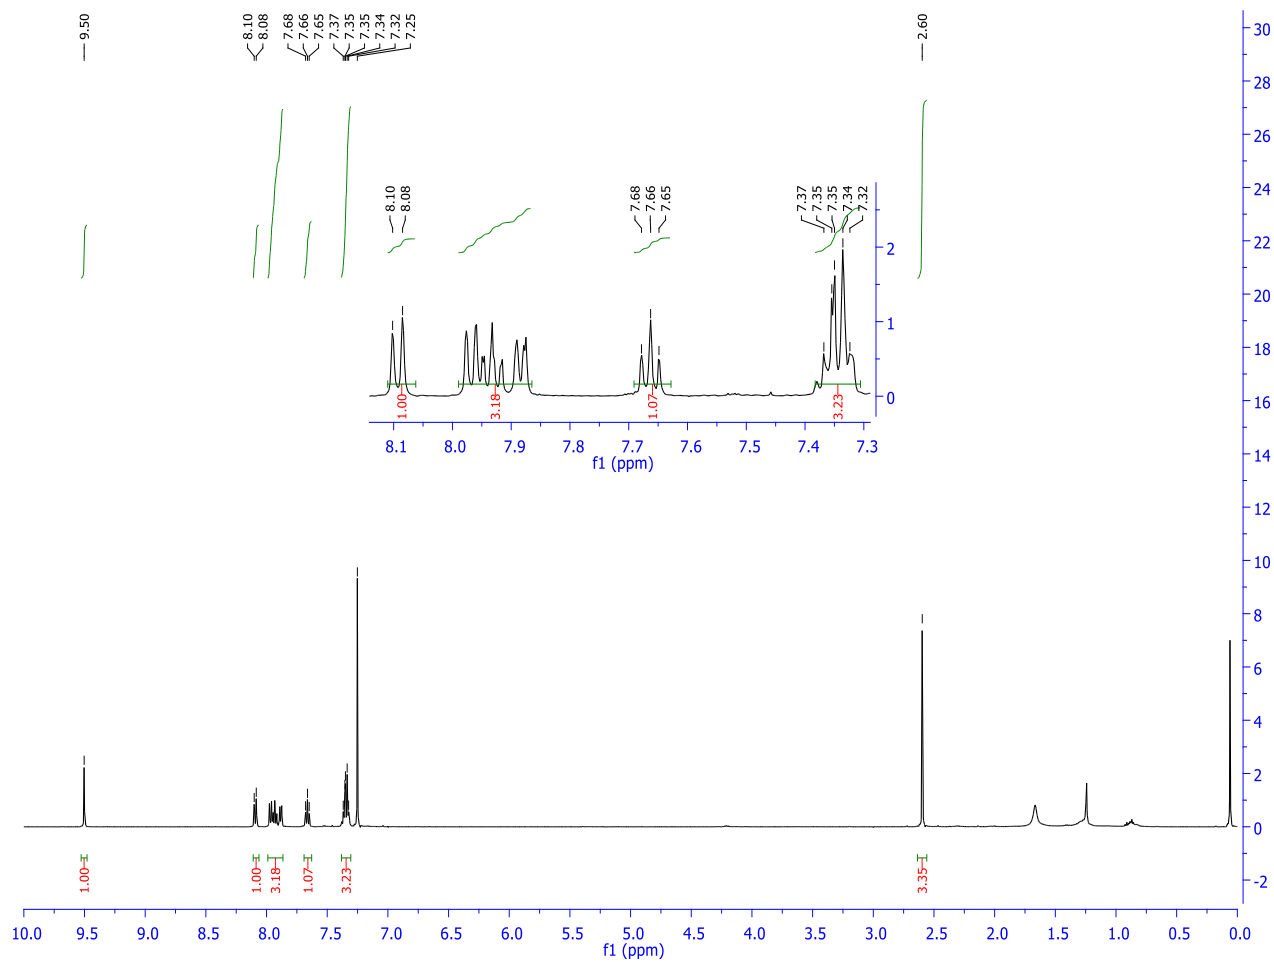

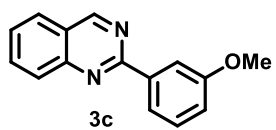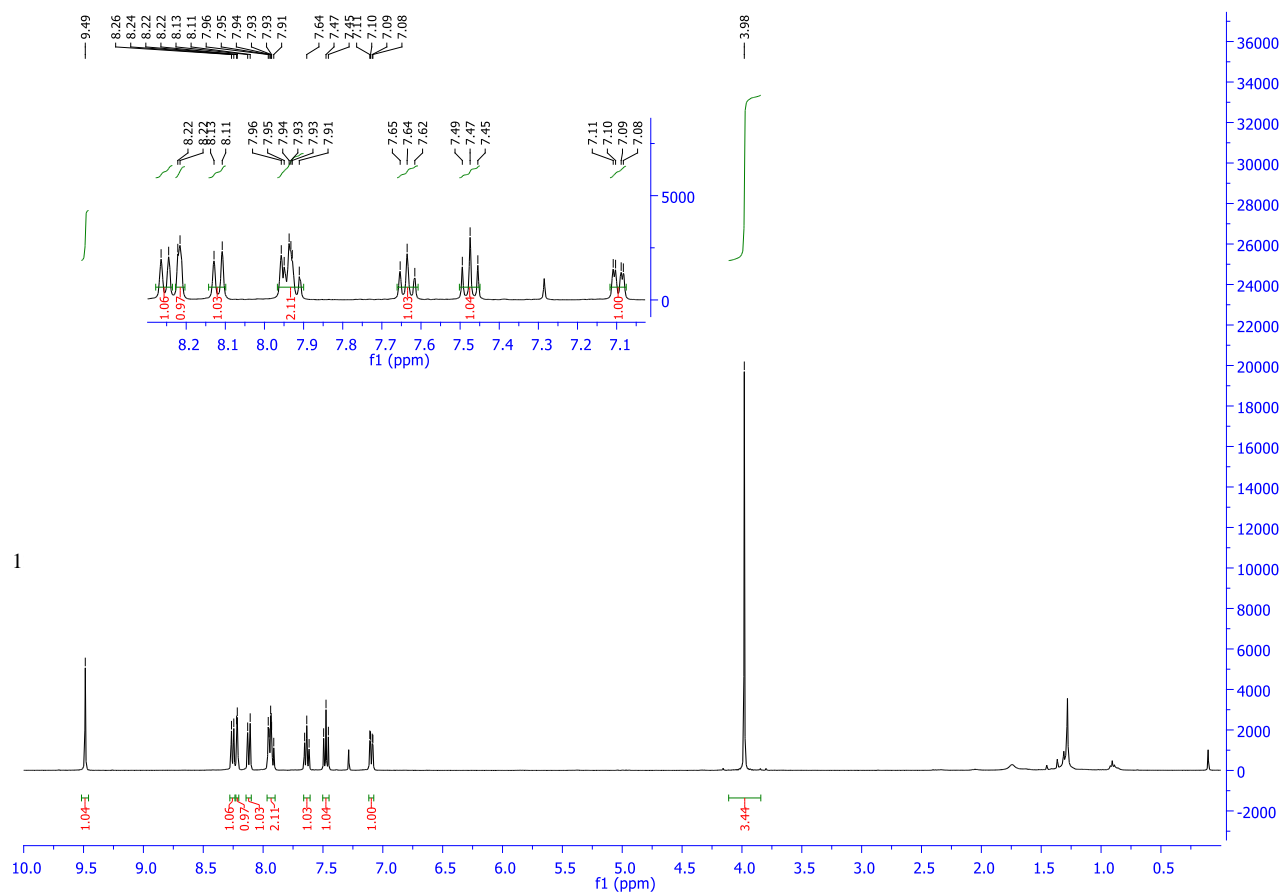

### <sup>13</sup>C Spectra

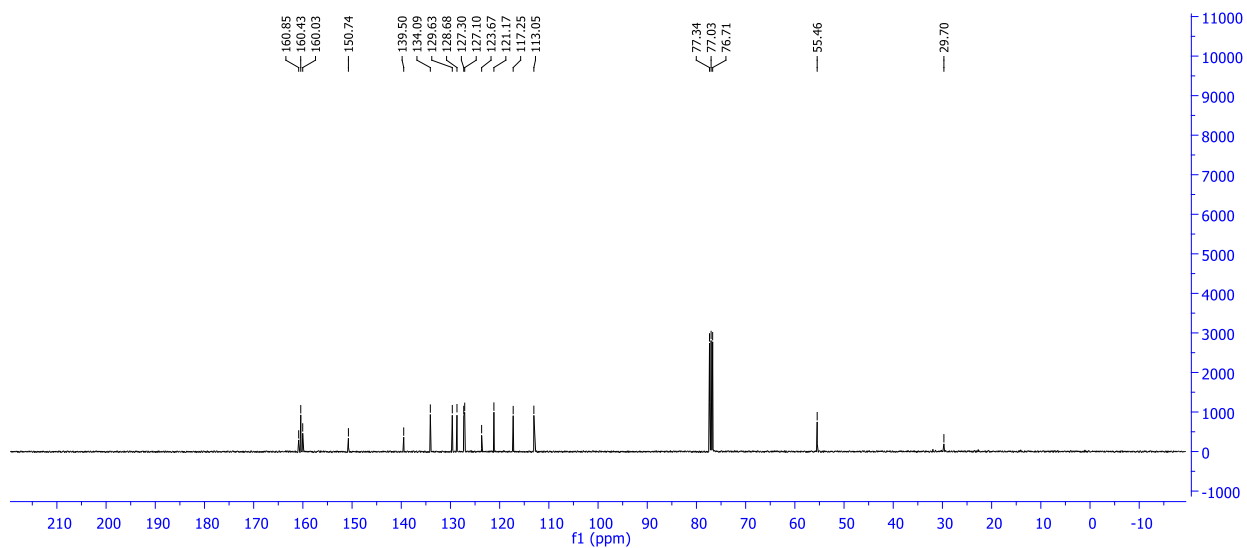

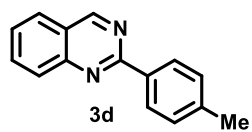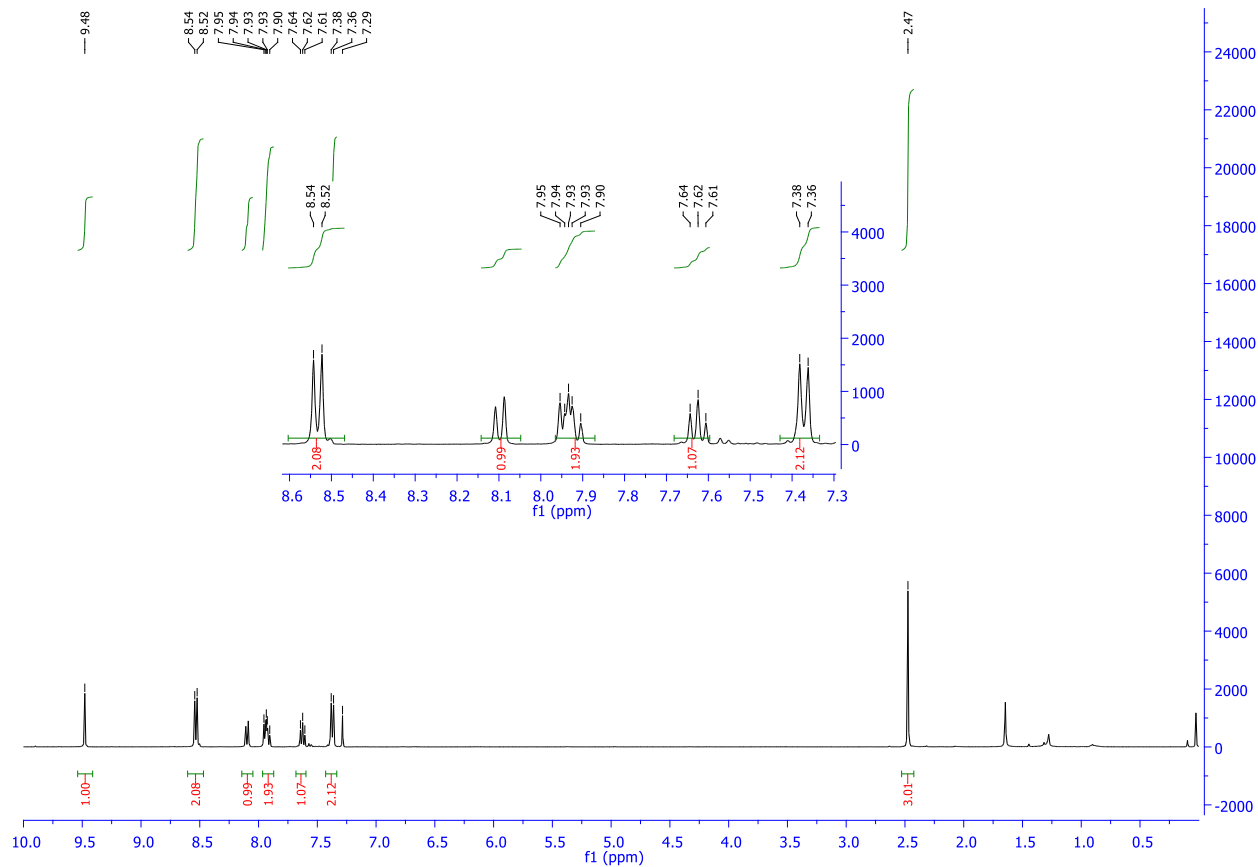

### <sup>13</sup>C Spectra

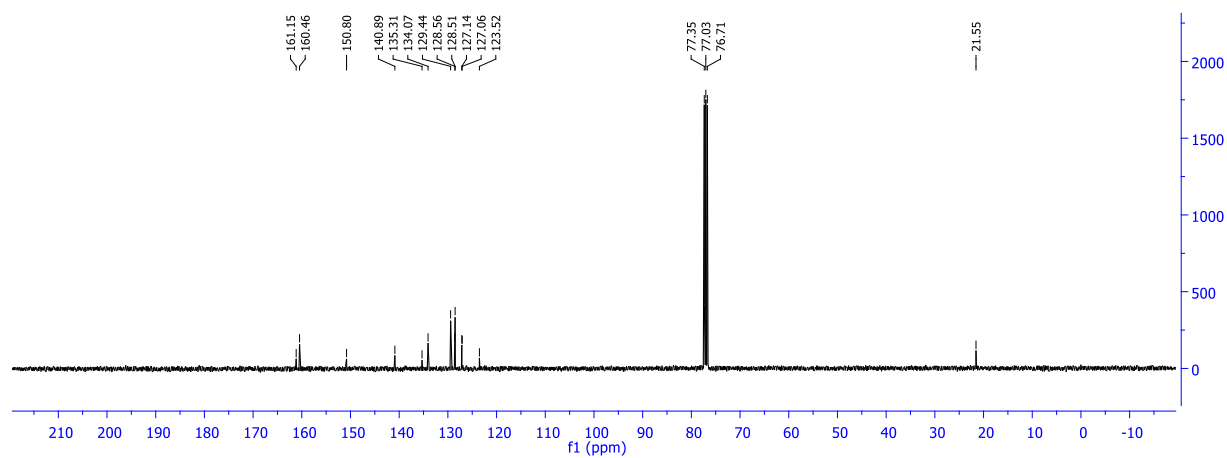

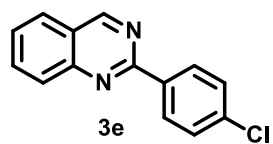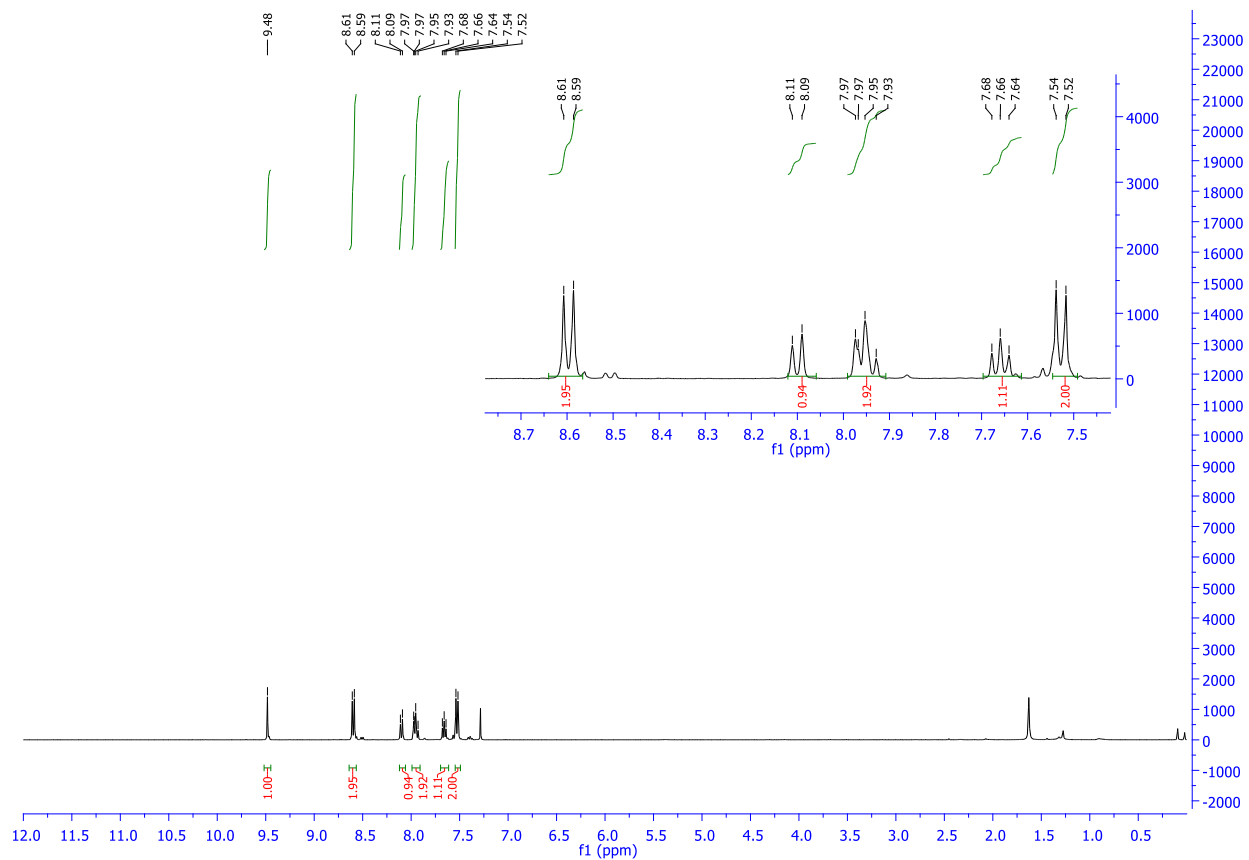

### <sup>13</sup>C Spectra

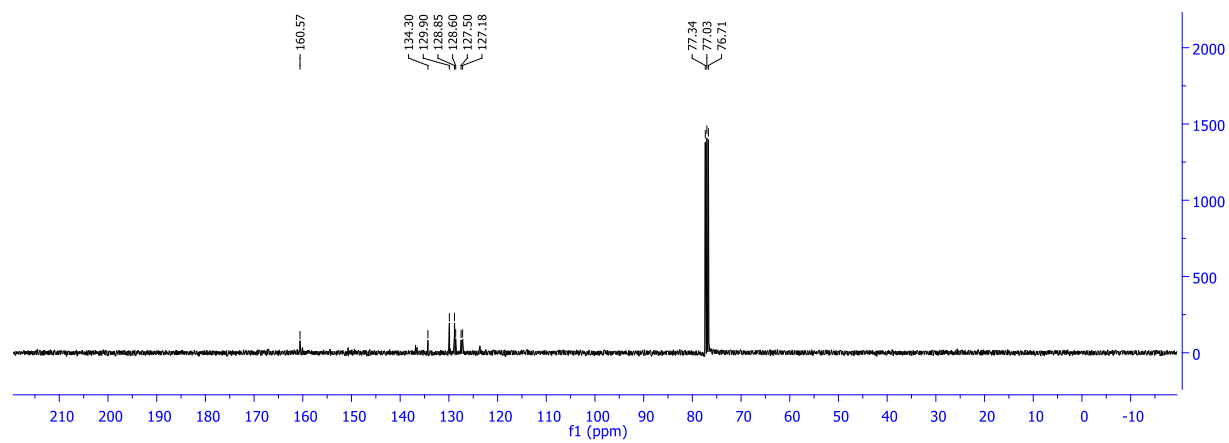

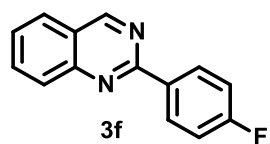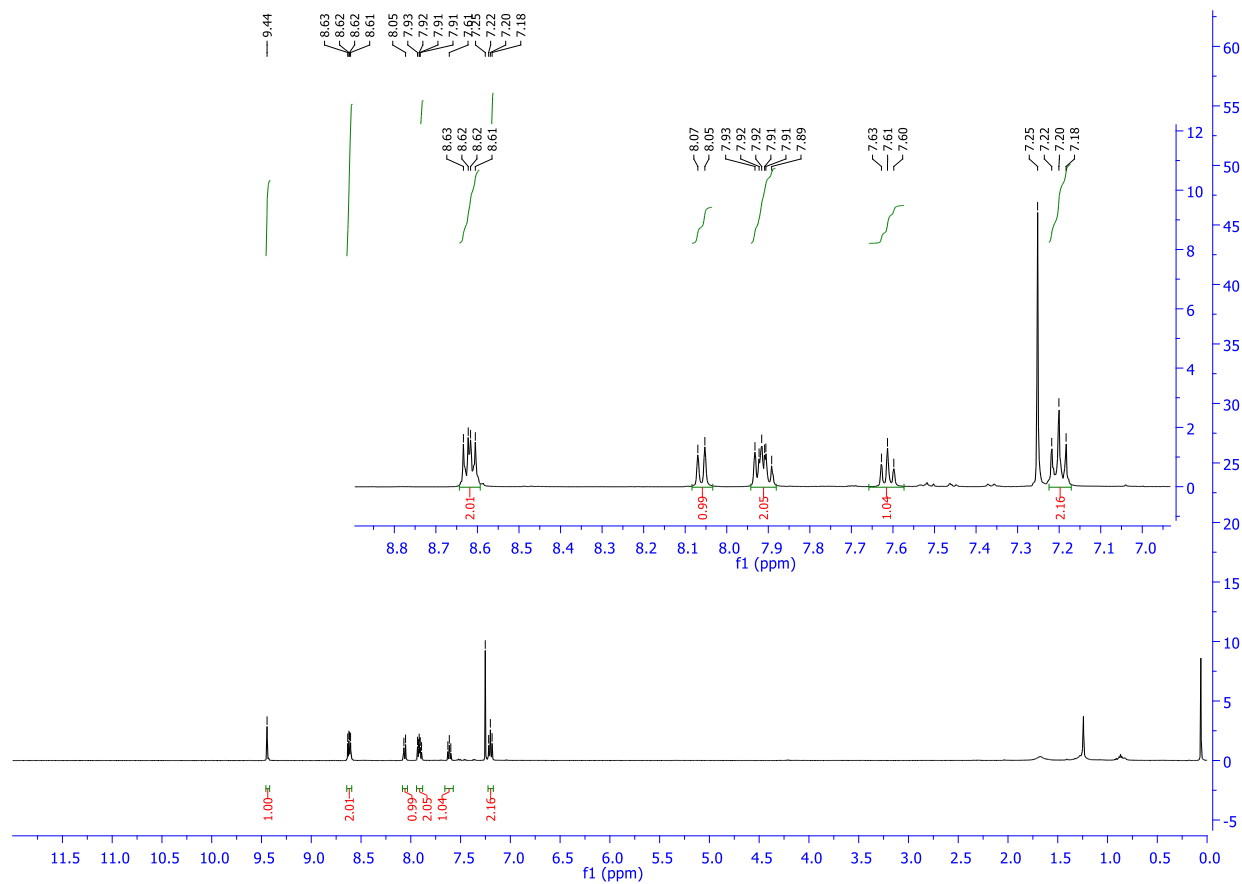

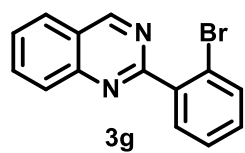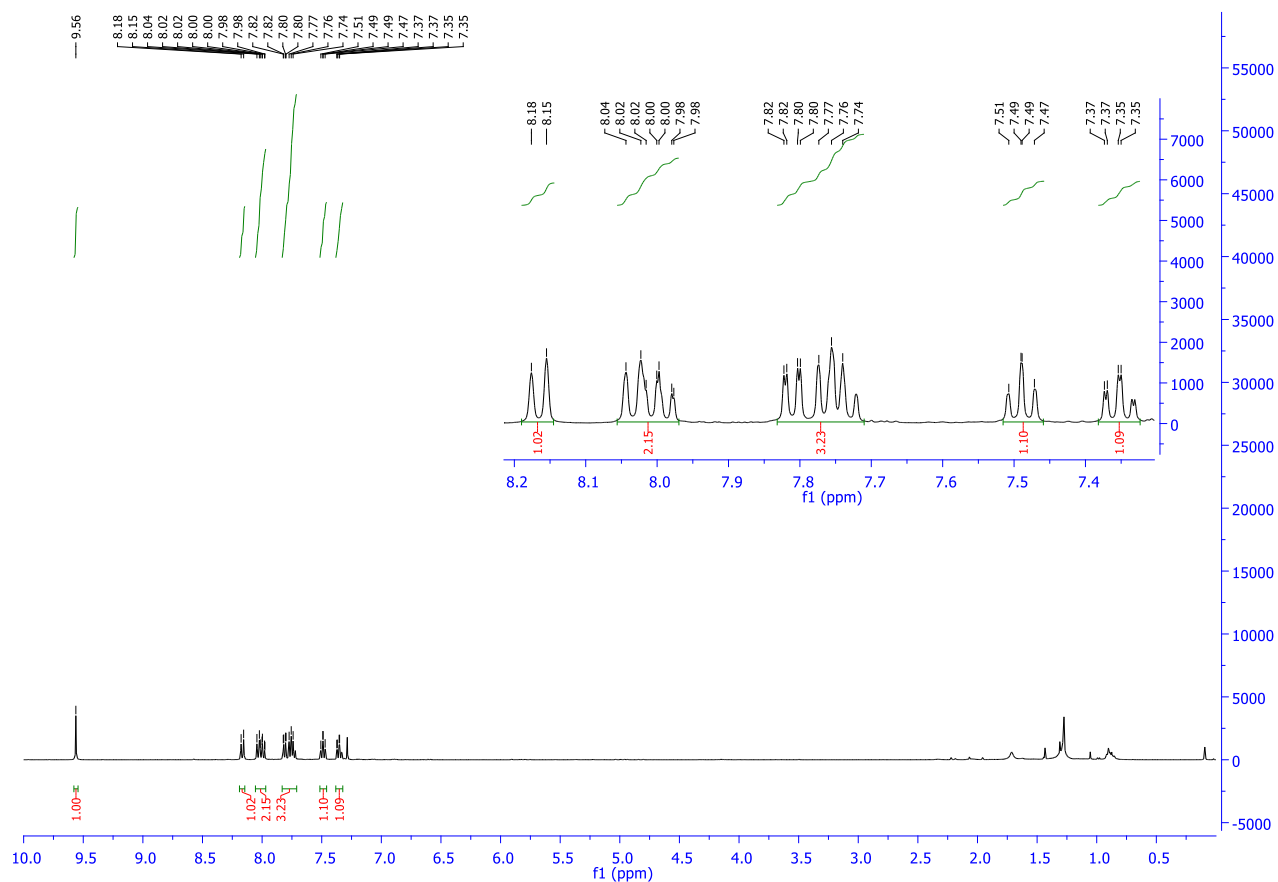

### <sup>13</sup>C Spectra

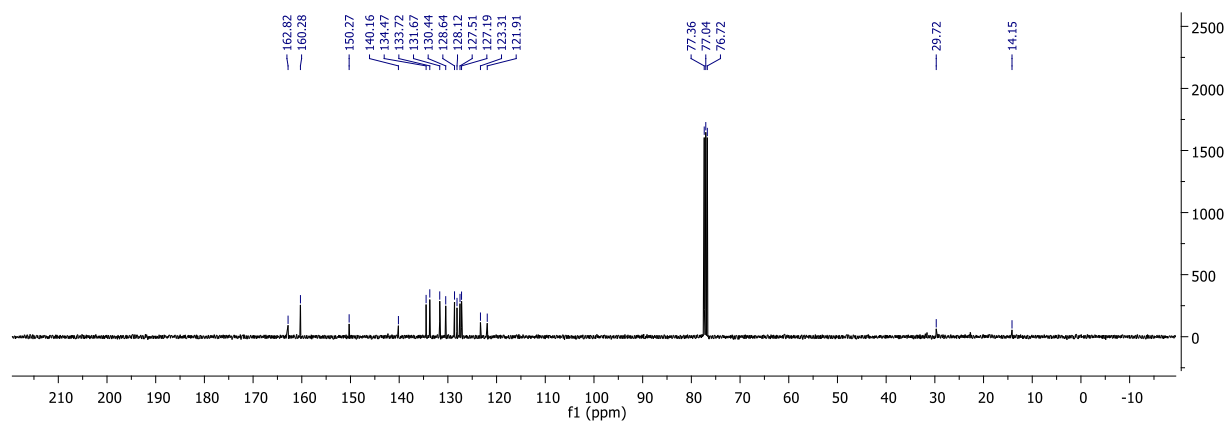

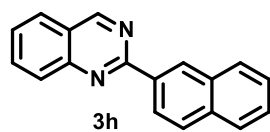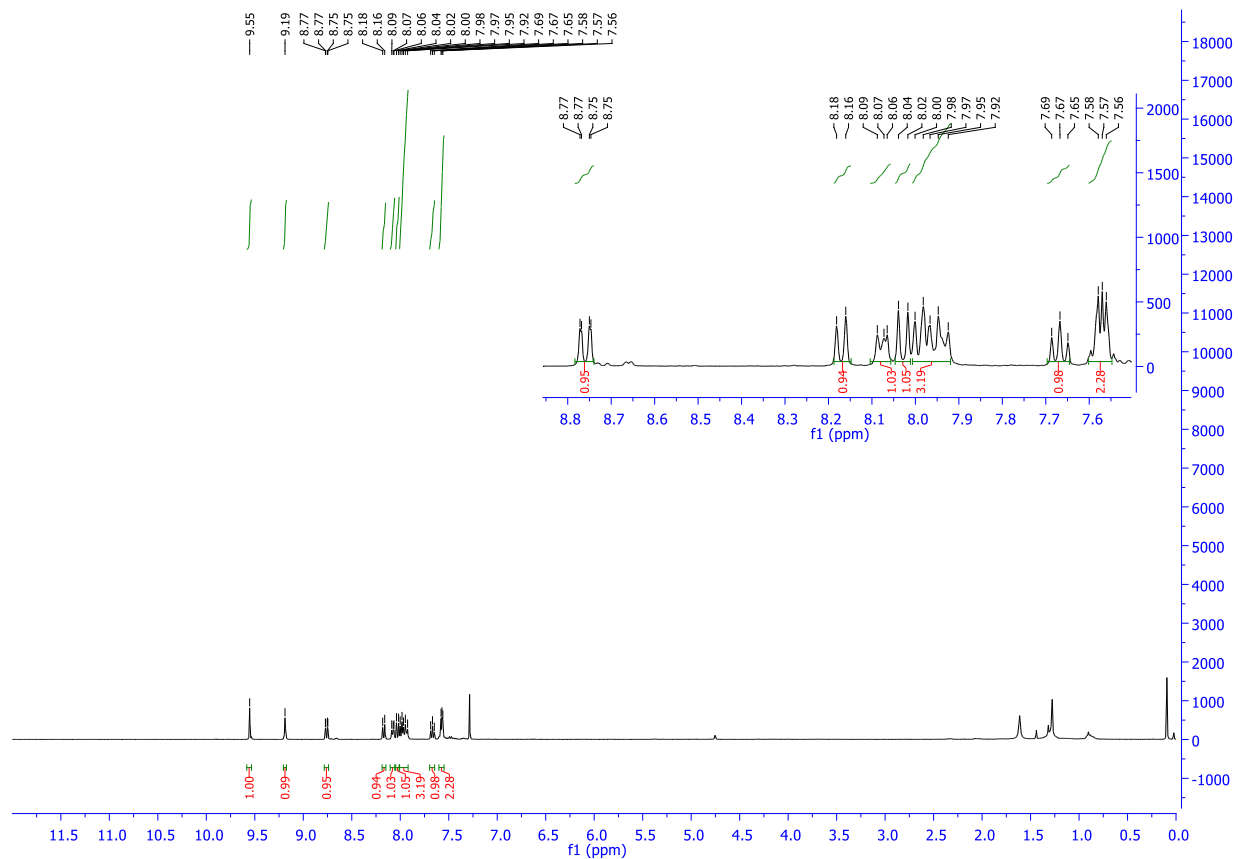

### <sup>13</sup>C Spectra

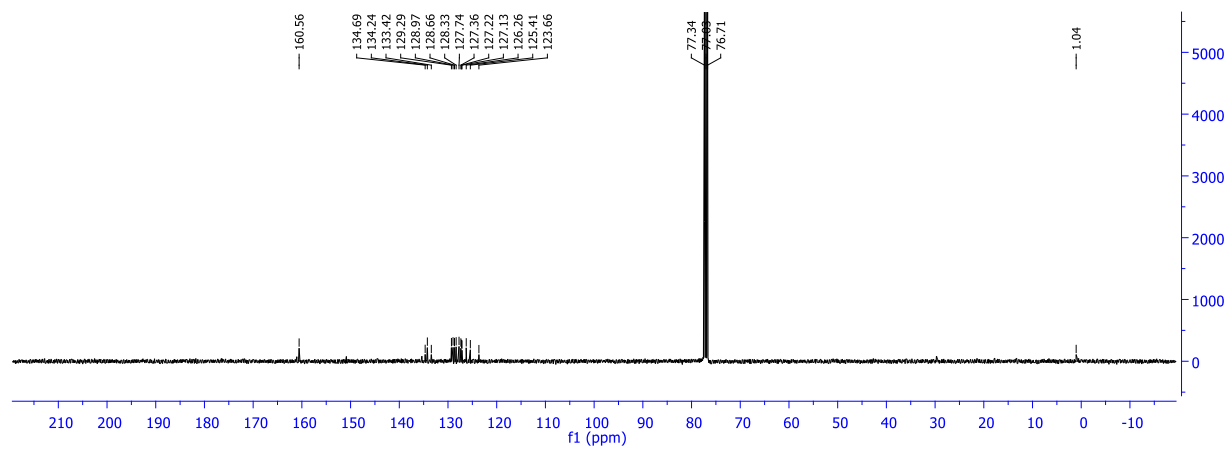

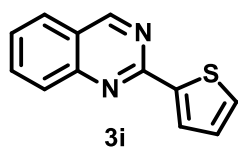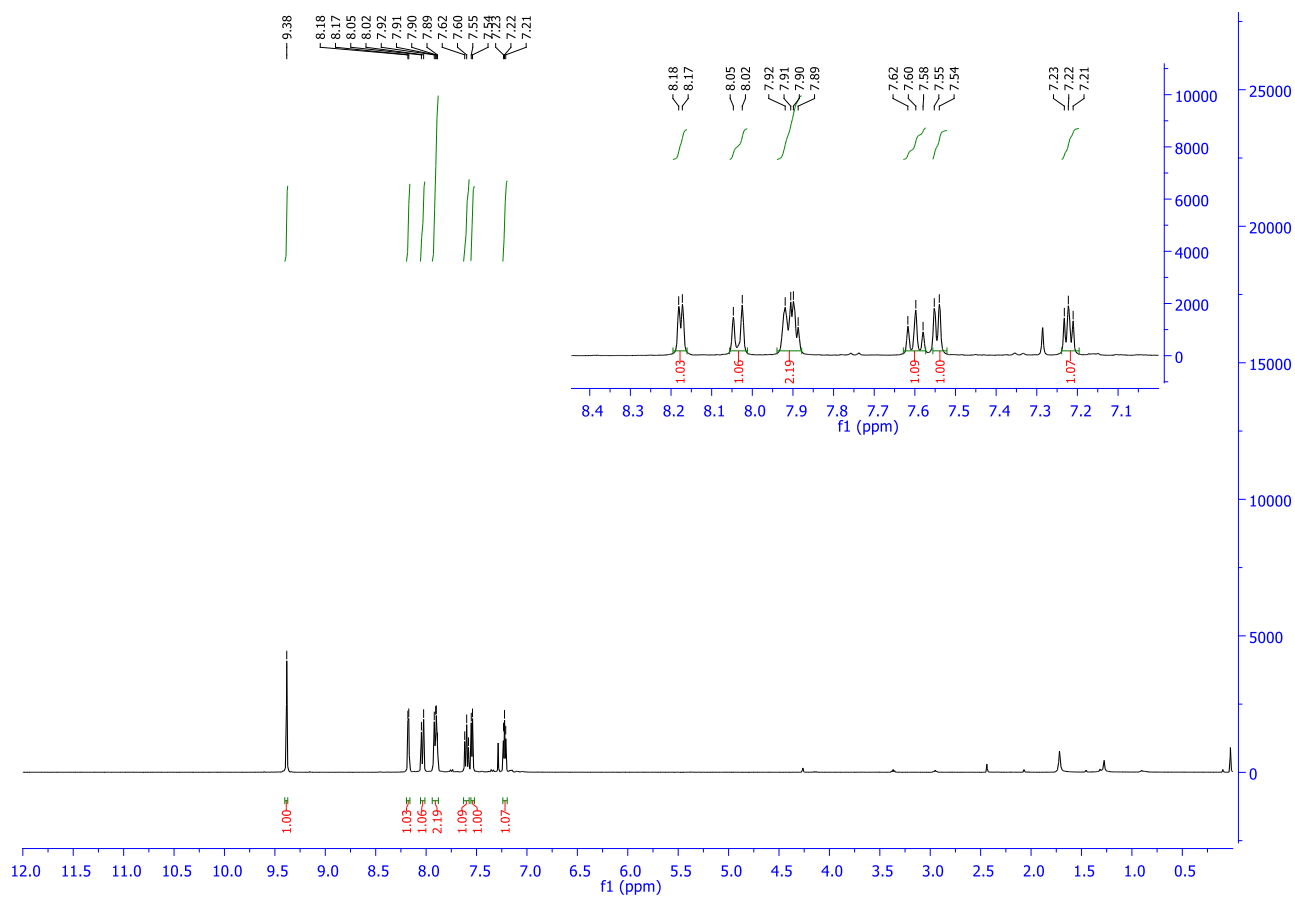

### <sup>13</sup>C Spectra

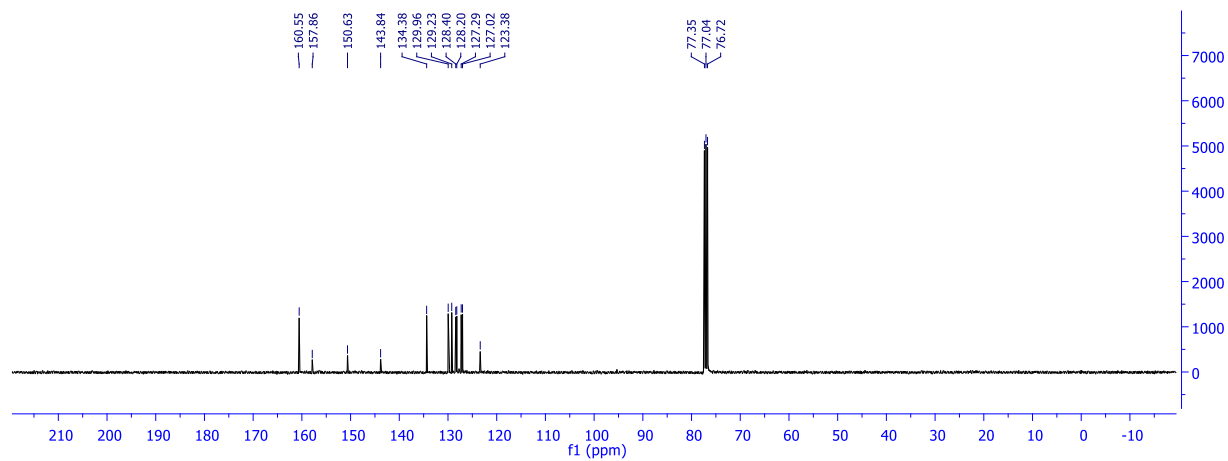



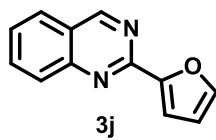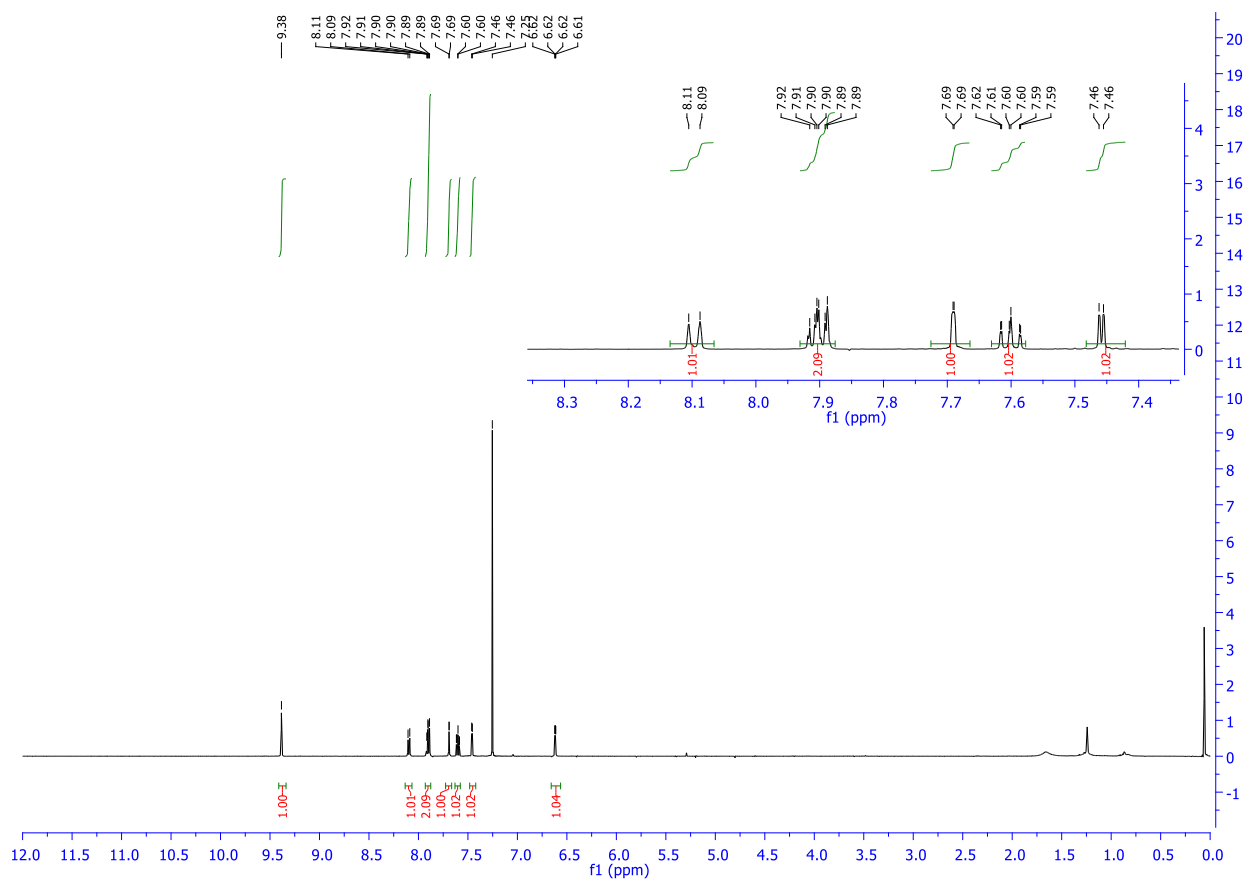

### <sup>13</sup>C Spectra

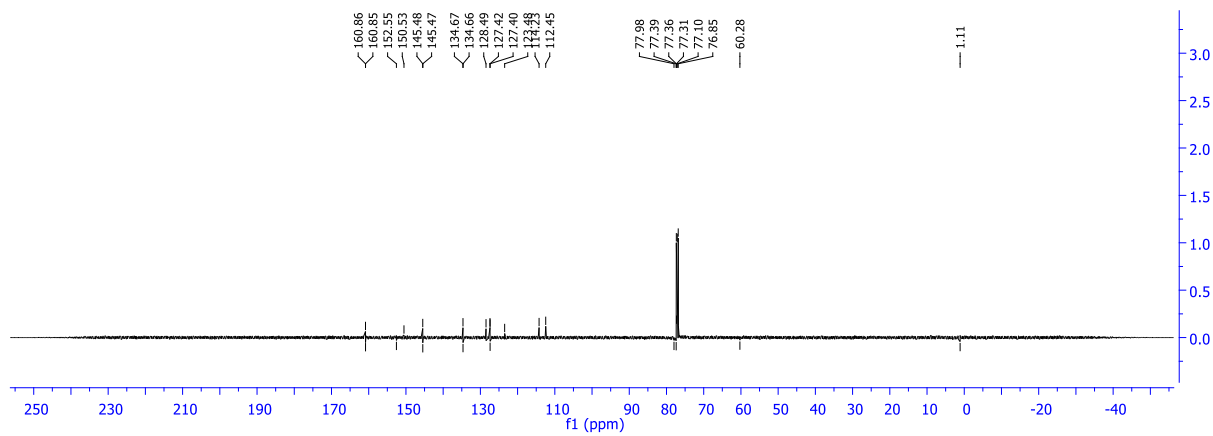

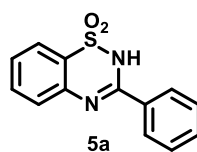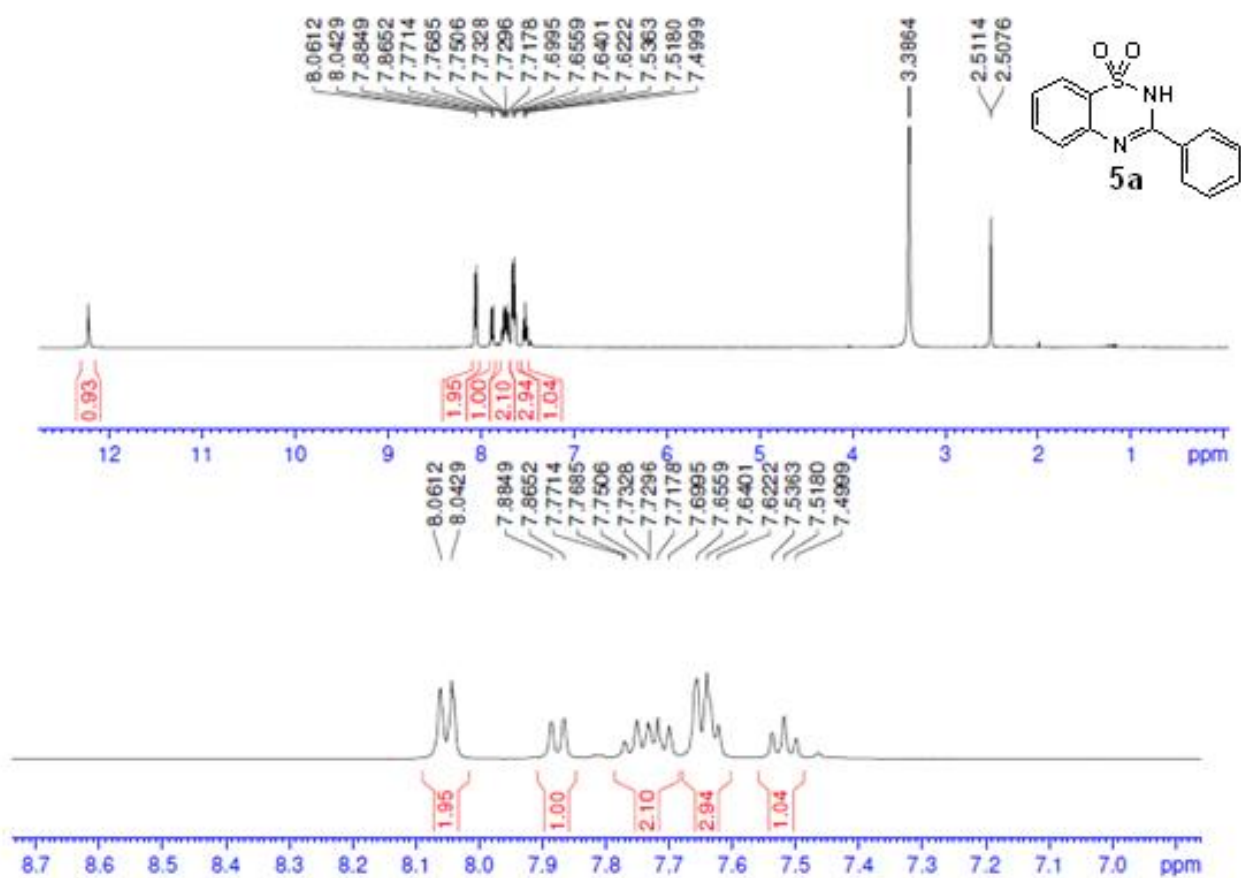

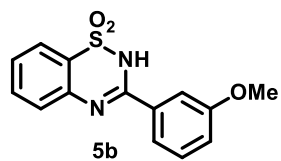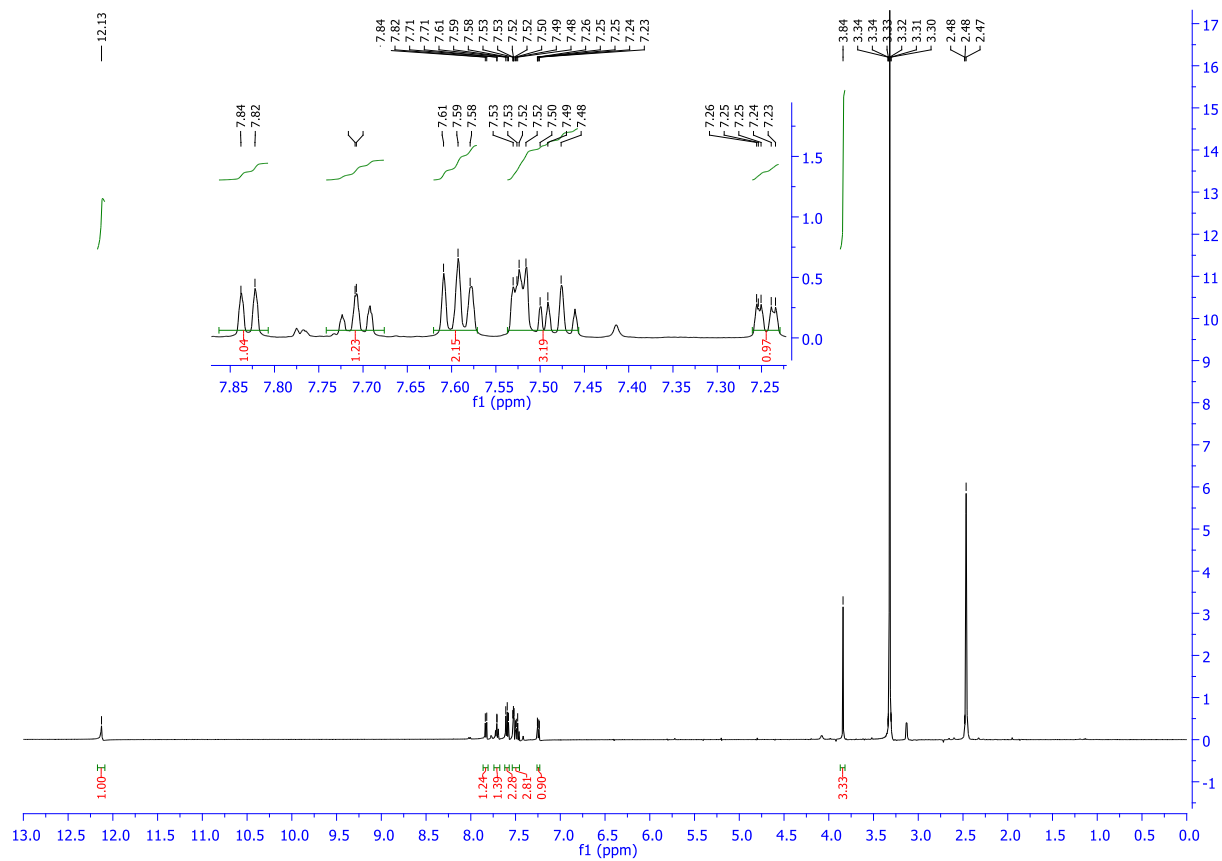

### <sup>13</sup>C Spectra

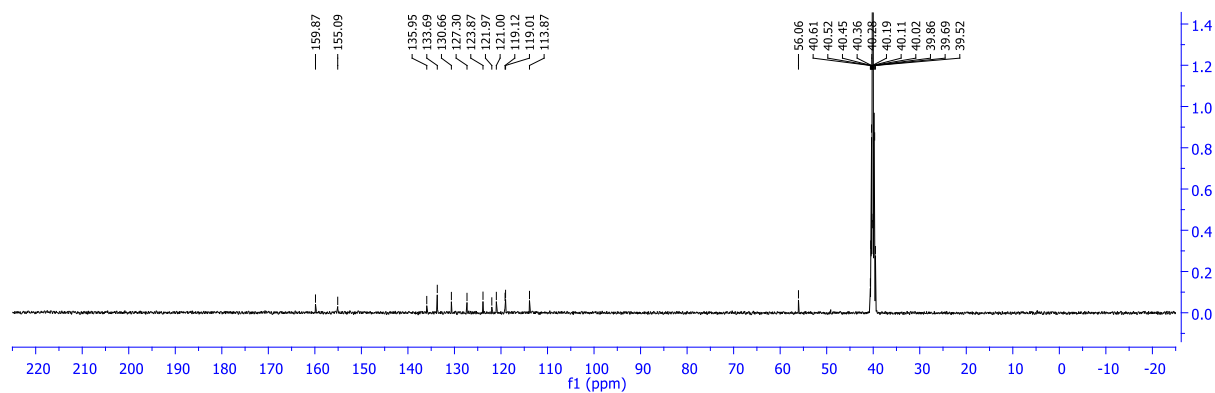

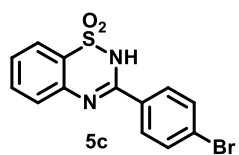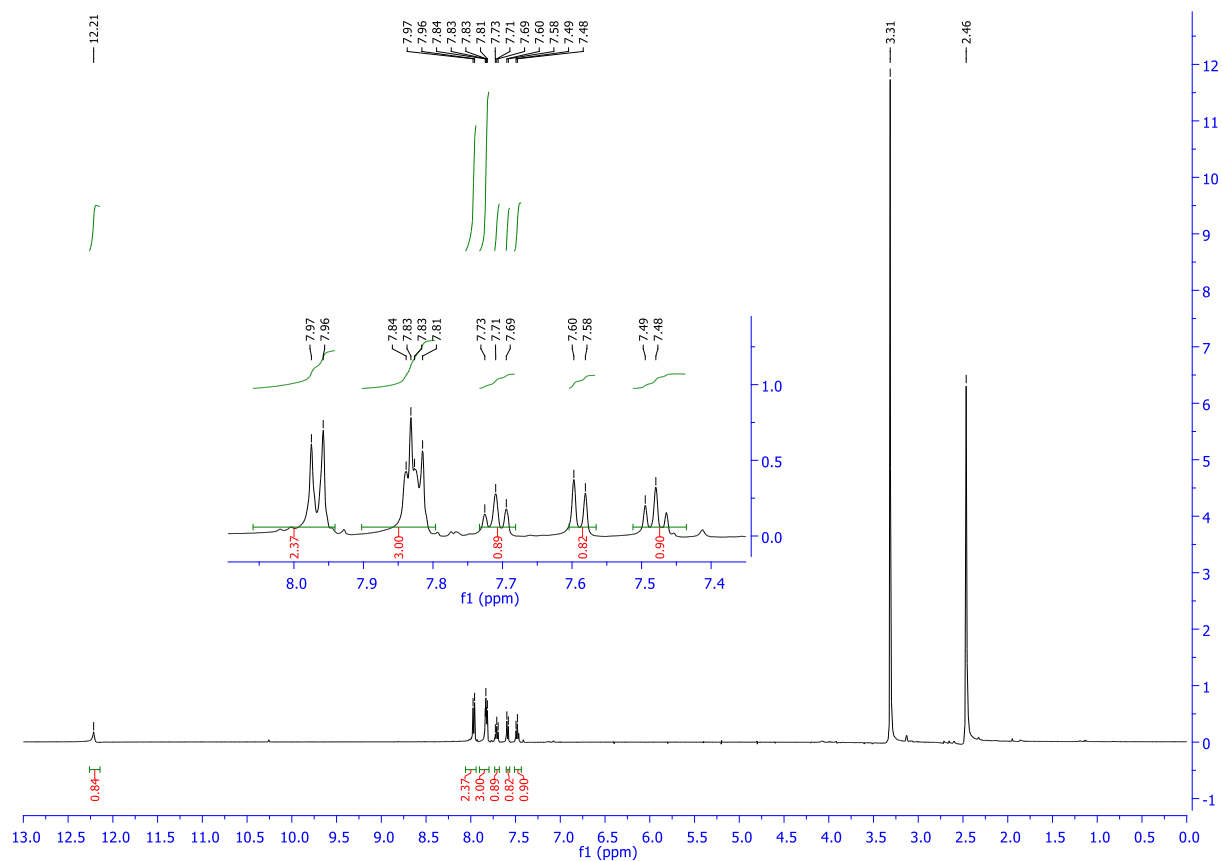

### <sup>13</sup>C Spectra

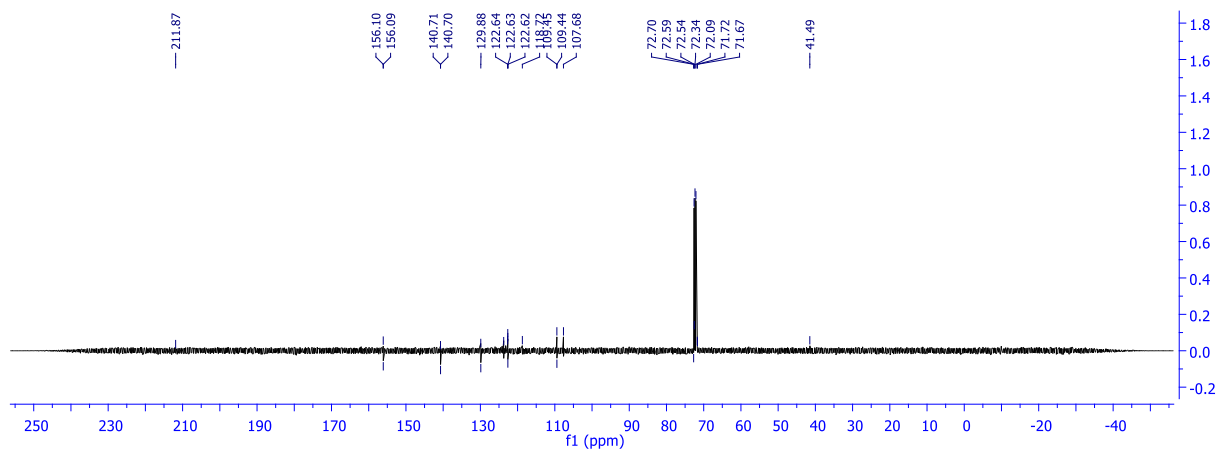

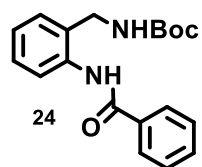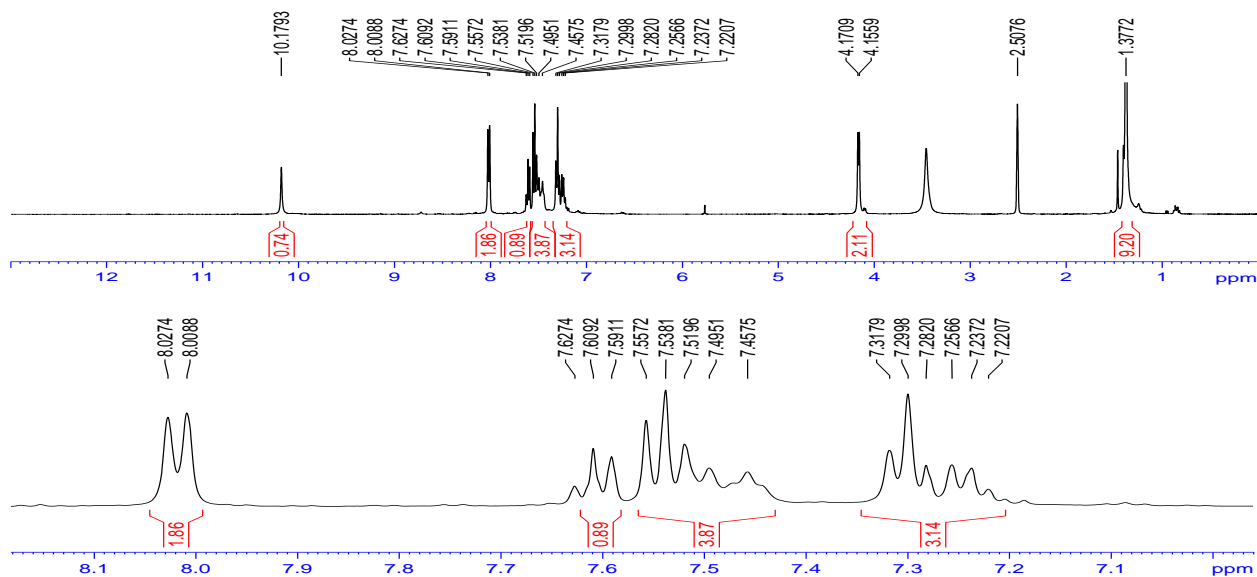

### <sup>13</sup>C Spectra

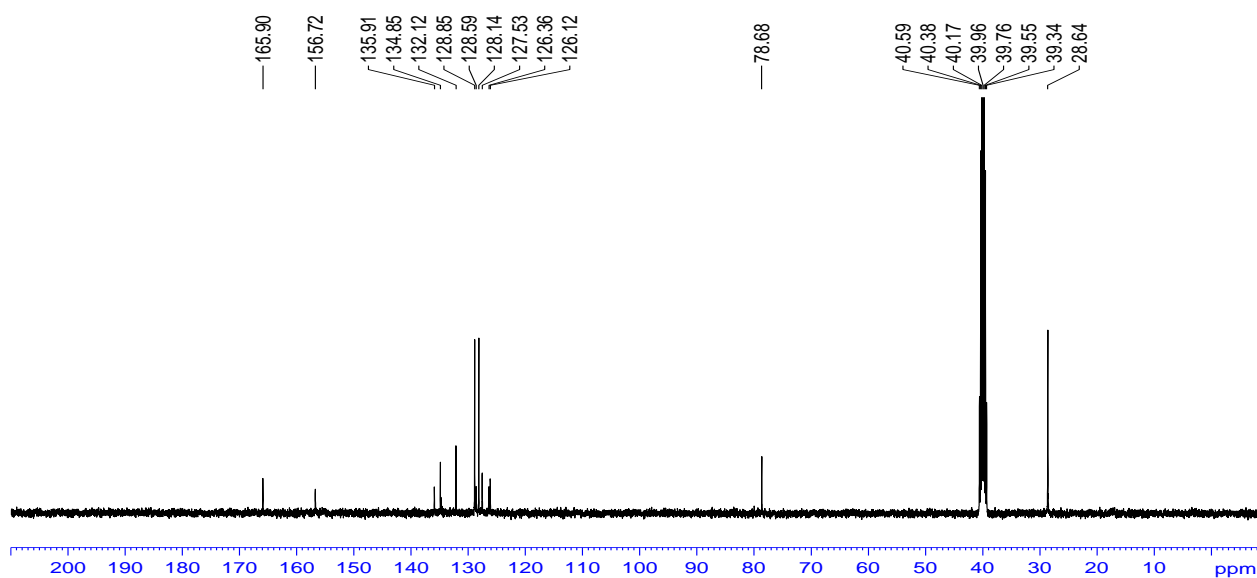

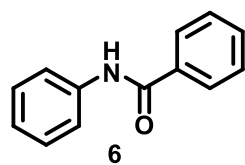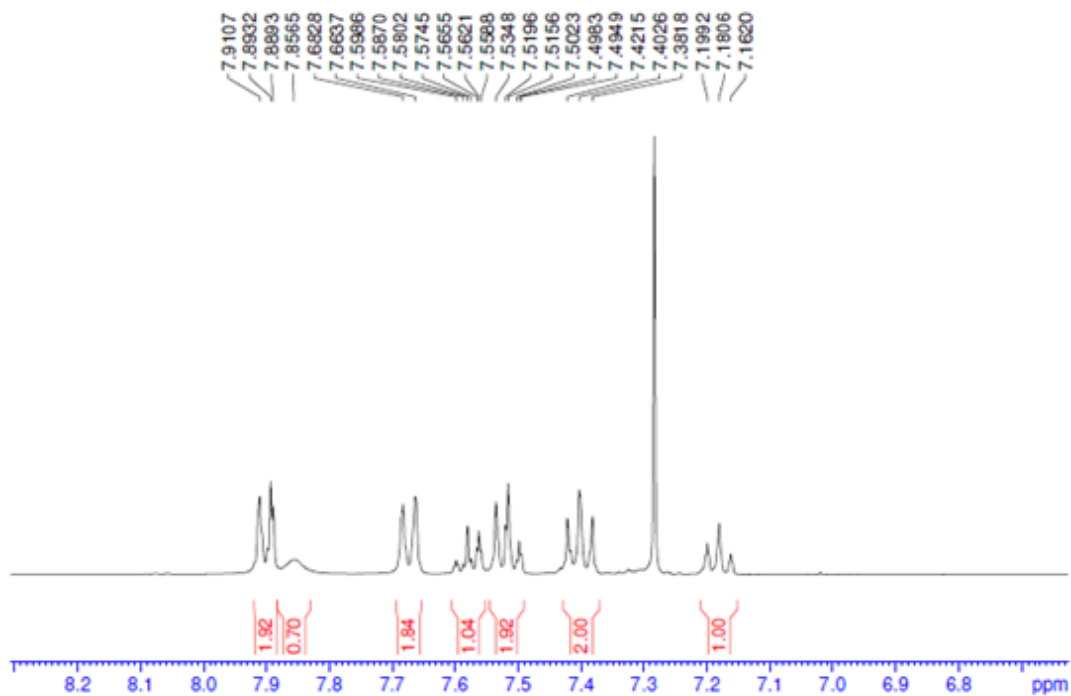

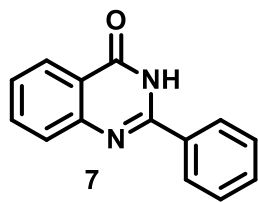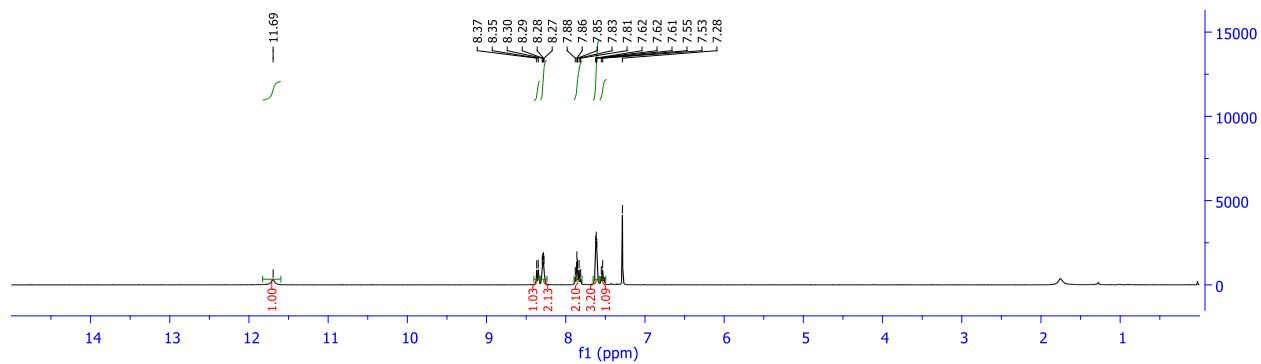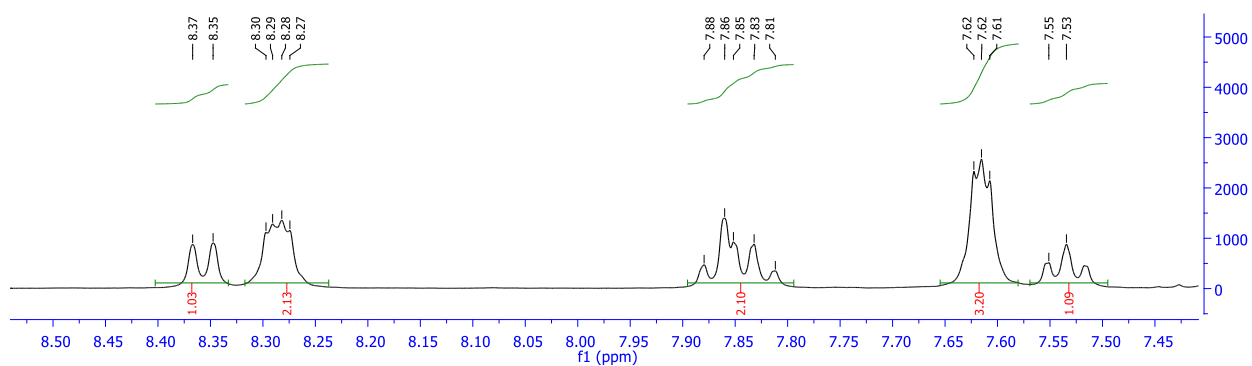

### <sup>13</sup>C Spectra

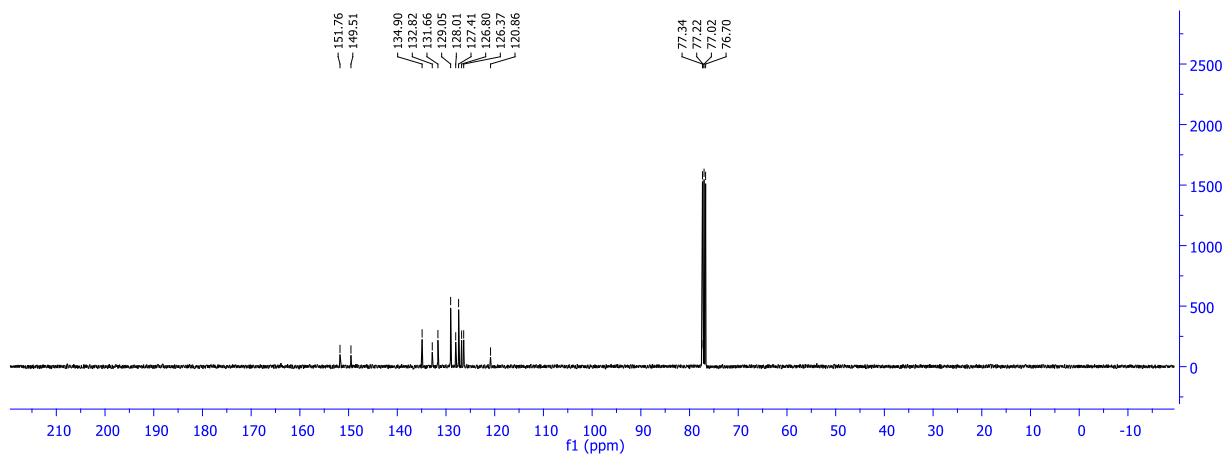

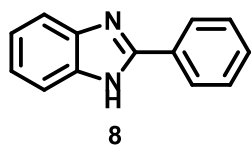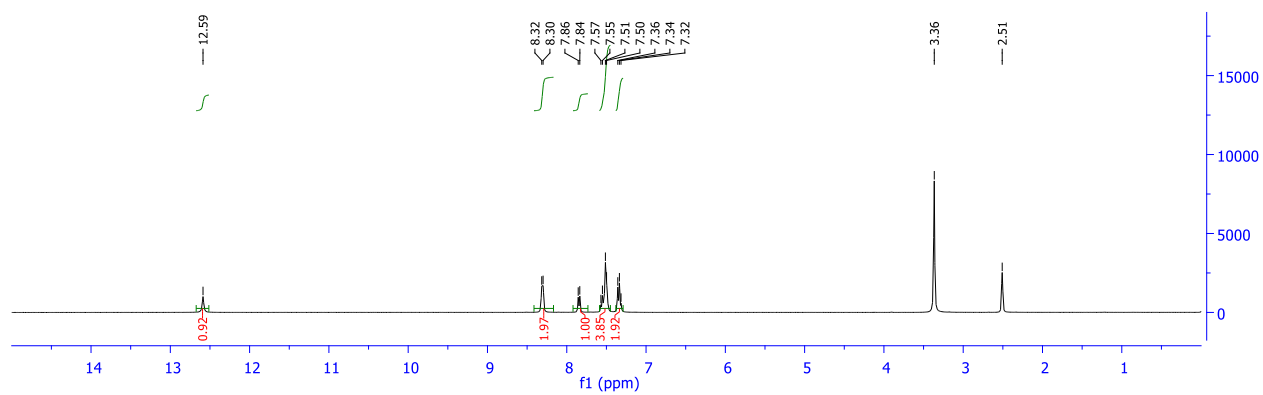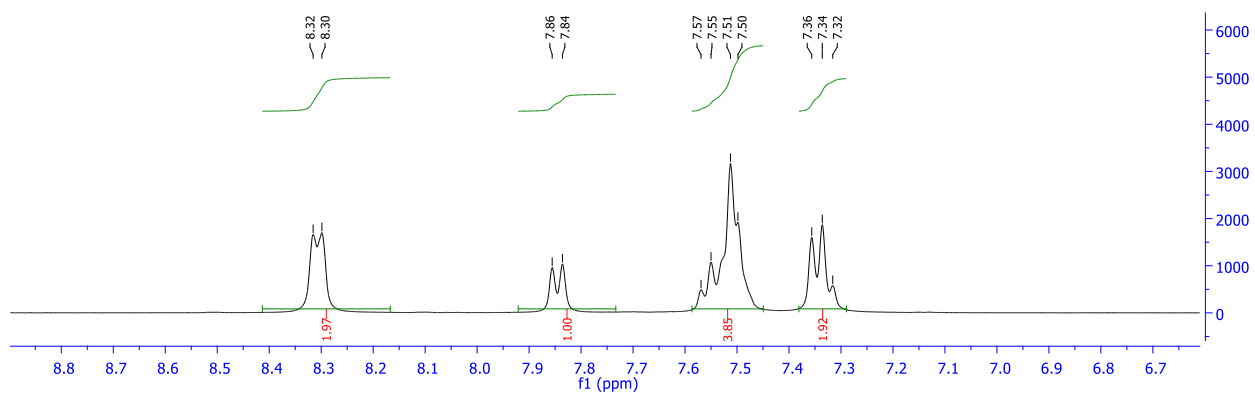

### <sup>13</sup>C Spectra

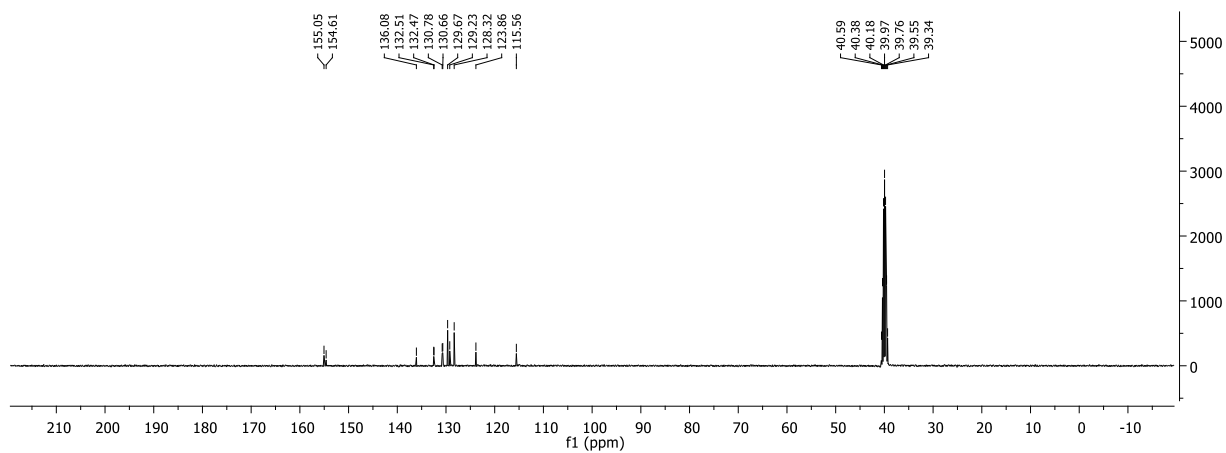



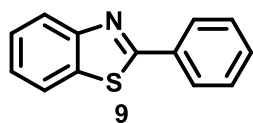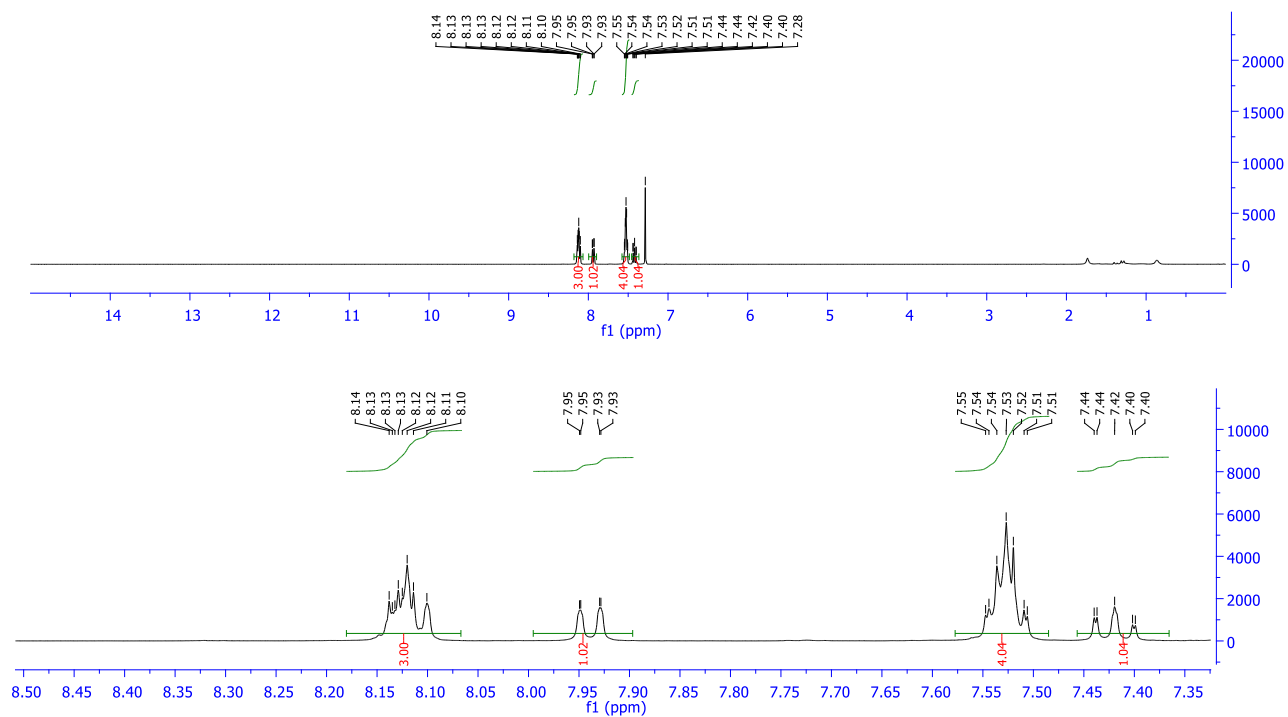

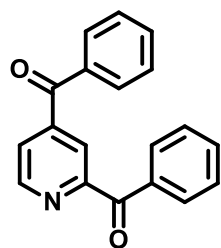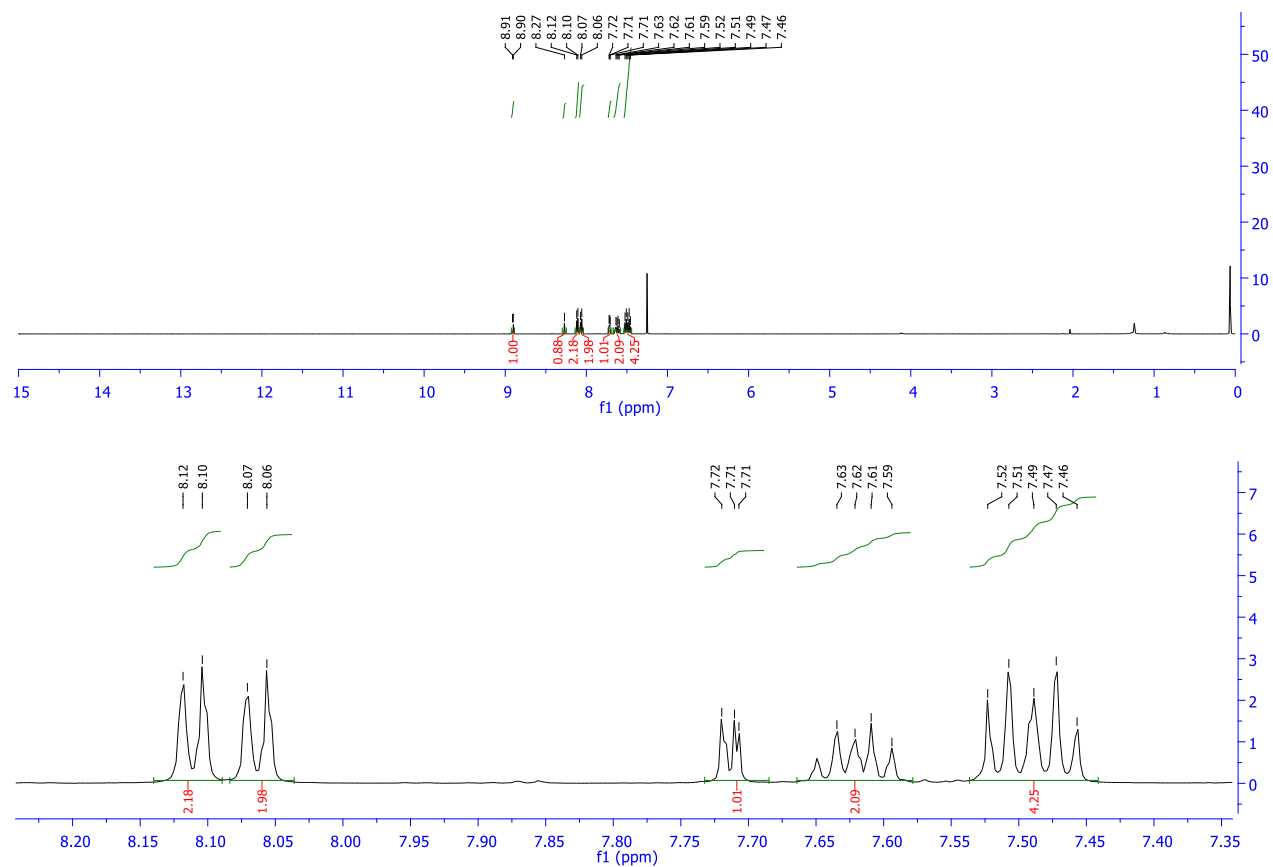

Diacylated pyridine ( minisci acylated product) Spectra with reference to scheme 6)

## 5.1 Mass Spectra

(Mass spectra with reference to scheme 4)

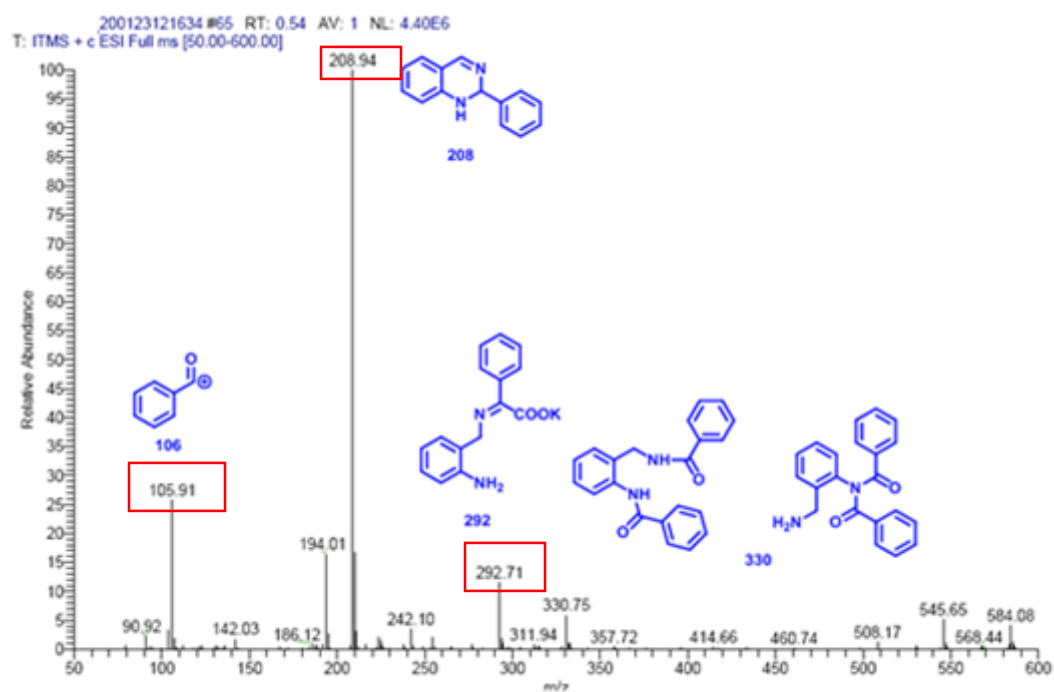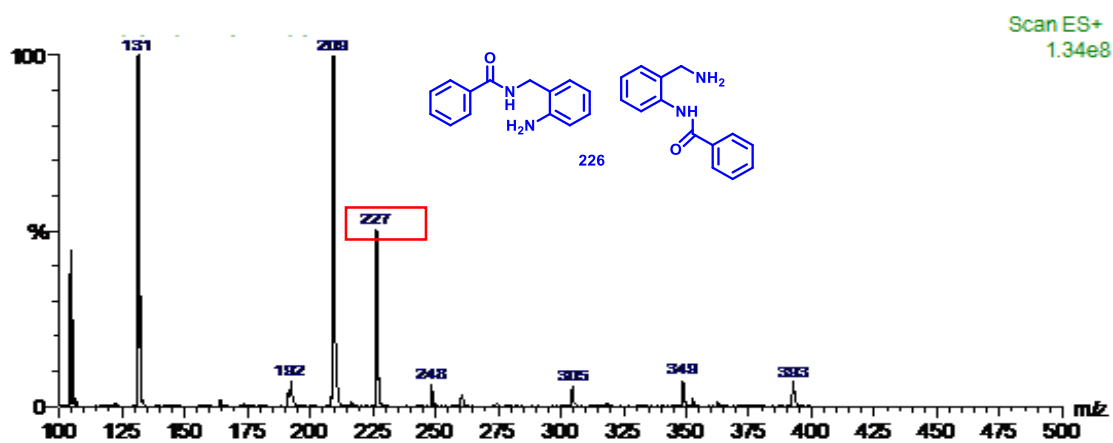

(Mass with reference to scheme 5)

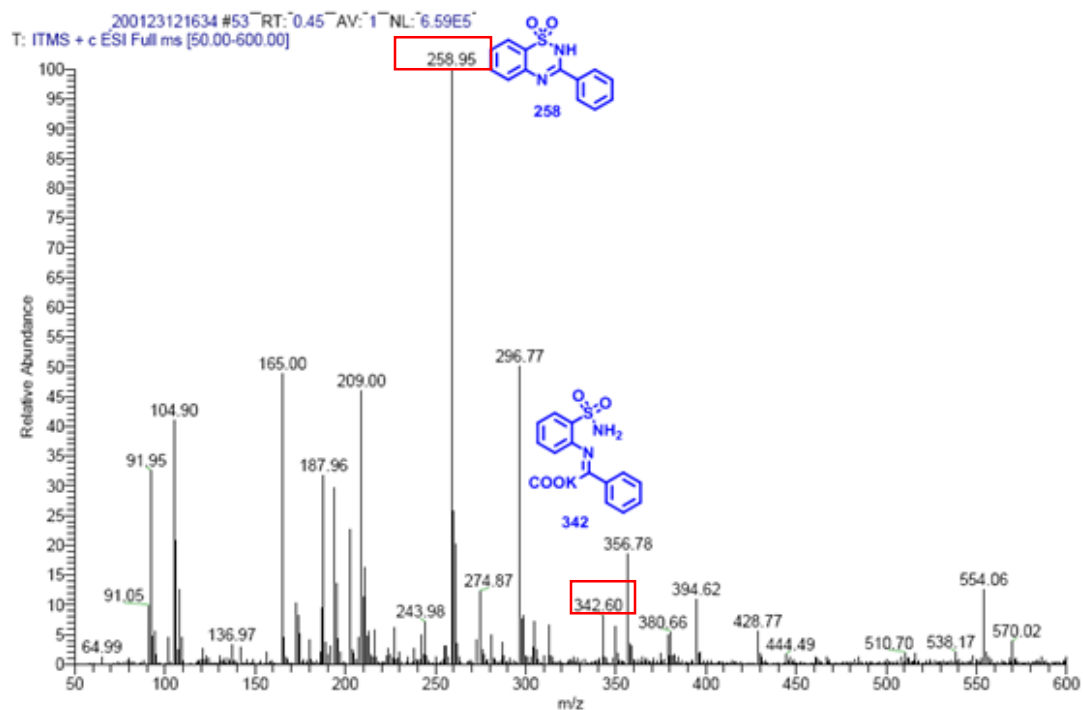

(Mass spectra with reference to scheme 6)

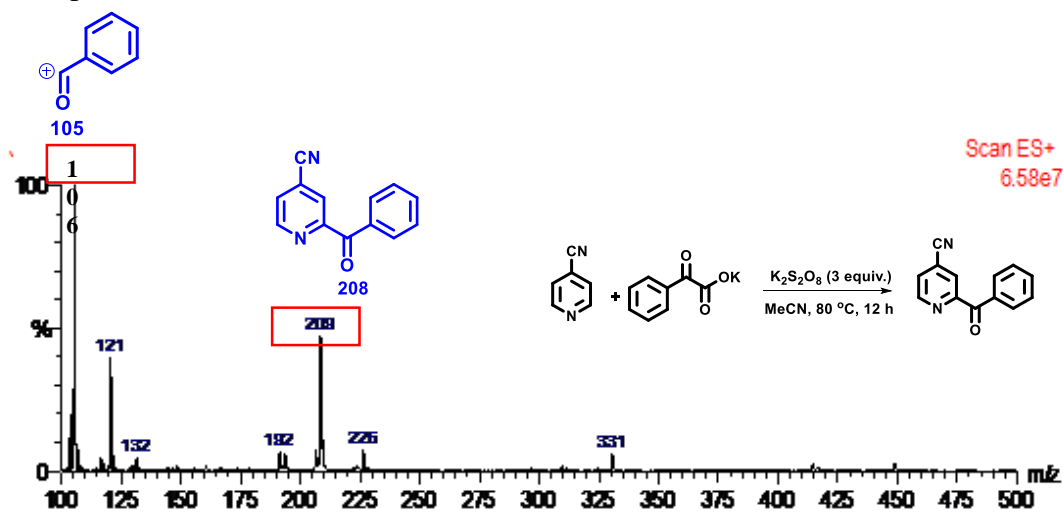

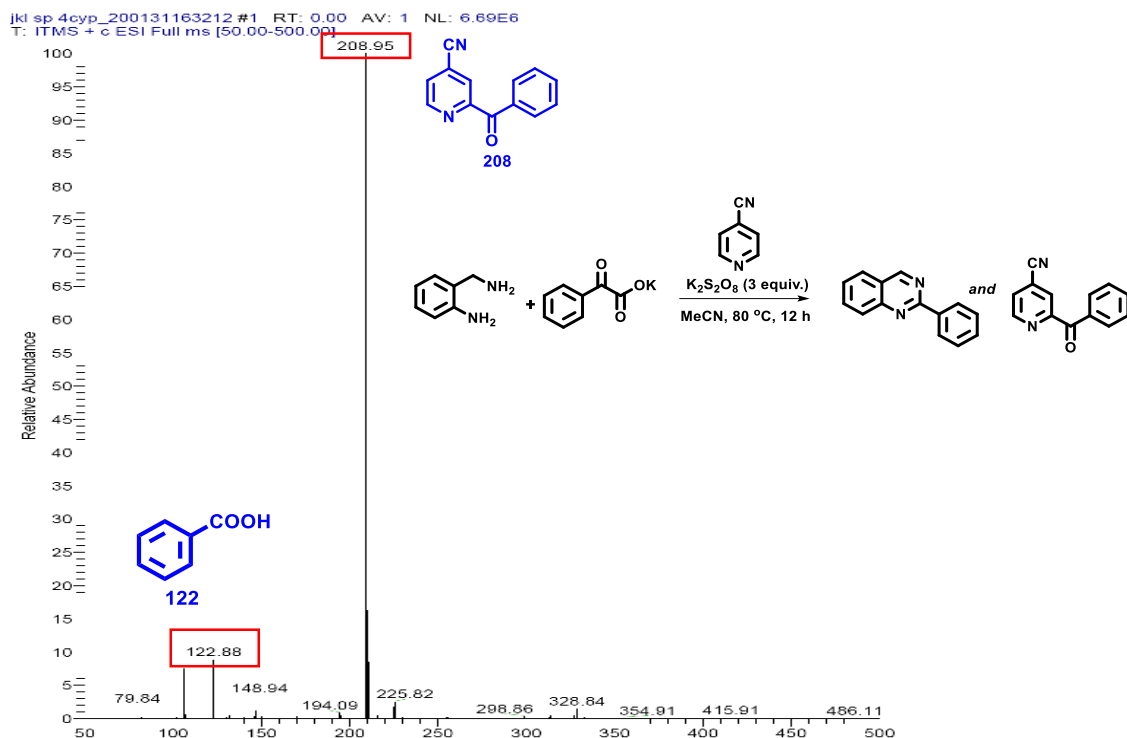

## 5.2 HPLC SPECTRA (With reference to scheme)

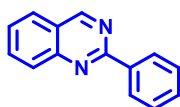

C.I.L  
NIPER

Sample Name Sample-JKL-SP-Q  
Method Name D:\Class-vp\Methods\IPSITA.met  
File Name D:\Class-vp\Data\Instrument\VK Laha\2020-02-03 Sample-JKL- SP-Q  
Injection Volume 20  
RunTime 2/3/2020 4:09:57 PM  
Print Time 2/3/2020 4:58:02 PM

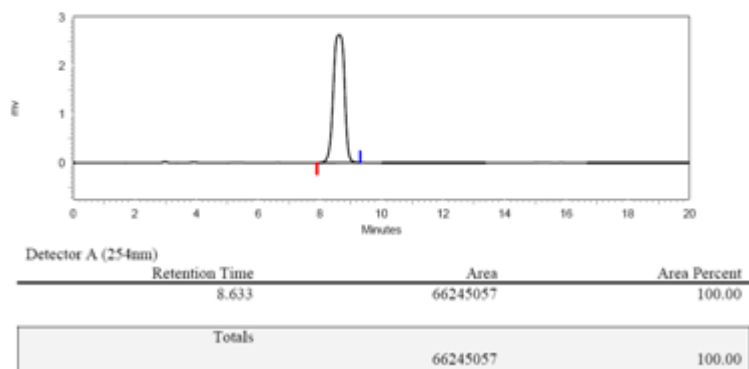

## Reaction with 4-cyanopyridine

### C.I.L NIPER

Sample Name Sample-JKL-SP-4CVP  
Method Name D:\Class-vp\Methods\IPSITA.met  
File Name D:\Class-vp\Data\Instrument1\JK Laha1\2020-02-03 Sample-JKL-SP- 4CVP  
Injection Volume 20  
RunTime 2/3/2020 3:48:03 PM  
Print Time 2/3/2020 4:55:18 PM

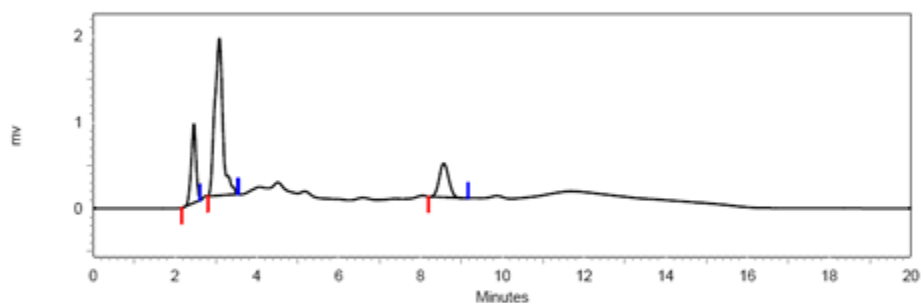

Detector A (254nm)

| Retention Time | Area     | Area Percent |
|----------------|----------|--------------|
| 2.458          | 7364292  | 18.98        |
| 3.083          | 25141540 | 64.79        |
| 8.575          | 6301114  | 16.24        |

|        |          |        |
|--------|----------|--------|
| Totals | 38806946 | 100.00 |
|--------|----------|--------|

## Reaction with methylacrylate

### C.I.L NIPER

Sample Name Sample-JKL-SP-METHA  
Method Name D:\Class-vp\Methods\IPSITA.met  
File Name D:\Class-vp\Data\Instrument1\JK Laha1\2020.02.25 Sample-JKL-SP-METHA  
Injection Volume 20  
RunTime 2/5/2020 4:34:15 PM  
Print Time 2/5/2020 5:11:47 PM

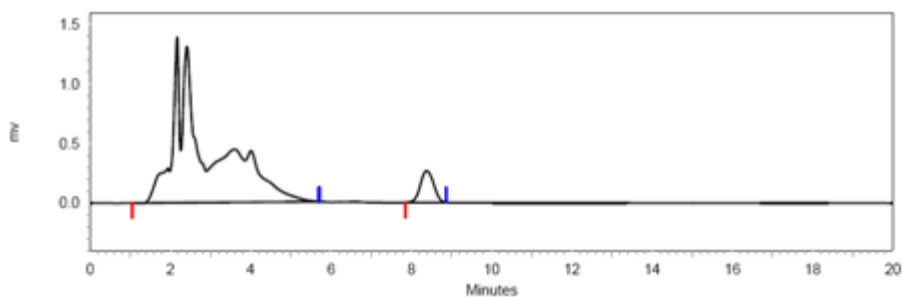

Detector A (254nm)

| Retention Time | Area     | Area Percent |
|----------------|----------|--------------|
| 2.167          | 79968472 | 92.88        |
| 8.383          | 6128735  | 7.12         |

|        |          |        |
|--------|----------|--------|
| Totals | 86097207 | 100.00 |
|--------|----------|--------|
